# Supplementary material for: Global ocean and sea ice variability simulated in eddy-permitting climate models
Source: Copernicus journal article supplement (doi:10.5194/egusphere-2025-2258), 2025-05-28
Supplement: Supplementary file 1 [file egusphere-2025-2258-supplement.pdf]

1  
2  
3  
4                   Supplementary file for  
5   Global ocean and sea ice variability simulated  
6                   in eddy-permitting climate models  
7  
8  
9

10   Yushi Morioka<sup>1</sup>, Eric Maisonnave<sup>2</sup>, Sébastien Masson<sup>2</sup>, Clement Rousset<sup>2</sup>,  
11   Luis Kornblueh<sup>3</sup>, Marco Giorgetta<sup>3</sup>, Masami Nonaka<sup>1</sup>, Swadhin K. Behera<sup>1</sup>  
12

13                   1: Application Laboratory, VAIg, JAMSTEC, Yokohama, Japan

14                   2: LOCEAN-IPSL, Sorbonne Université, Paris, France

15                   3: Max Planck Institute for Meteorology, Hamburg, Germany  
16

17                   May 14, 2025 (submitted)

18                   Geoscientific Model Development  
19

20  
21  
22                   Corresponding Author: Yushi Morioka

23                   Showamachi 3173-25, Kanazawa-ku, Yokohama, JAPAN

24                   morioka@jamstec.go.jp, +81-45-778-5509  
25  
26

## 27 Supplementary Figures

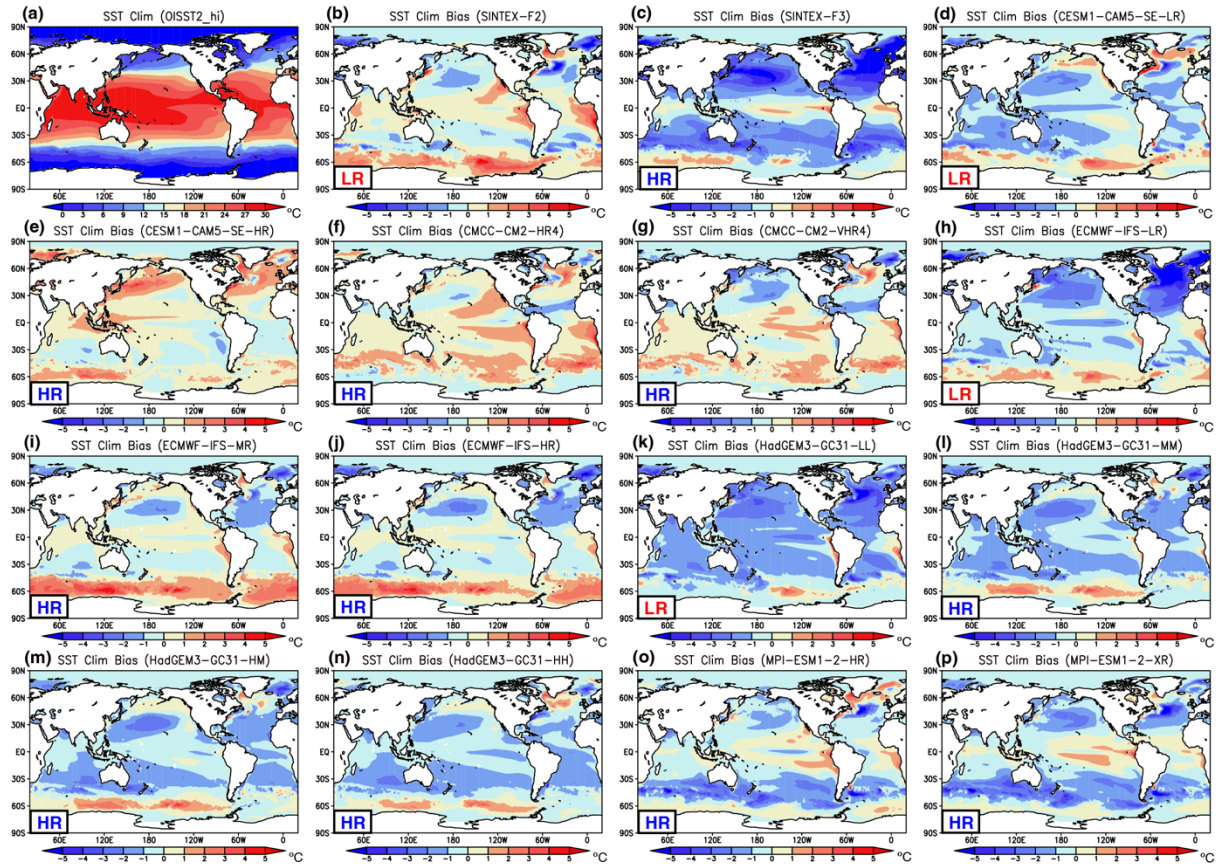

**Supplementary Figure 1** (a) Annual mean of the observed sea surface temperature (SST, in °C) during 1982-2022 from the OISST2\_hi dataset. (b) Difference in the annual mean SST (in °C) between the SINTEX-F2 model and the OISST2\_hi (i.e., model minus observation). (c-p) Same as in (b), but for the SINTEX-F3, CESM1-CAM5-SE-LR, CESM1-CAM5-SE-HR, CMCC-CM2-HR4, CMCC-CM2-VHR4, ECMWF-IFS-LR, ECMWF-IFS-MR, ECMWF-IFS-HR, HadGEM3-GC31-LL, HadGEM3-GC31-MM, HadGEM3-GC31-HM, HadGEM3-GC31-HH, MPI-ESM1-2-HR, and MPI-ESM1-2-XR models, respectively. The LR in the bottom left of the panel stands for the low-resolution model, whereas the HR corresponds to the high-resolution model.

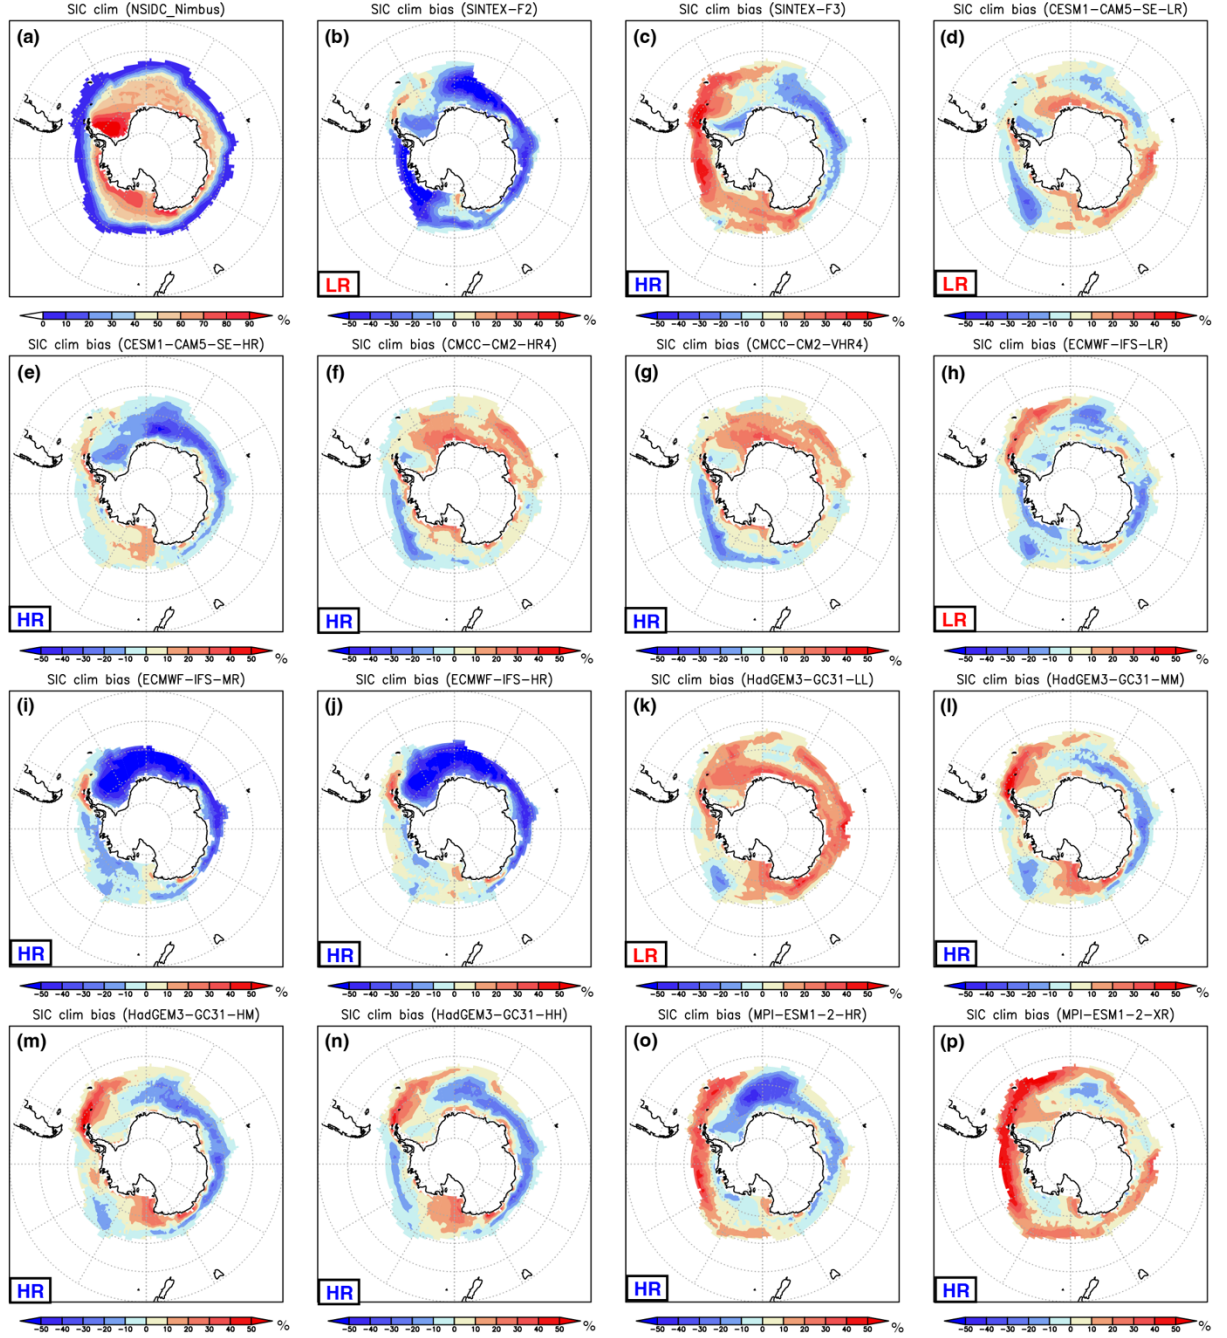

**Supplementary Figure 2** (a) Annual mean of the observed sea ice concentration (SIC, in %) in the Antarctic Sea during 1982-2022 from the NSIDC\_Nimbus dataset. (b) Difference in the annual mean SIC (in %) between the SINTEX-F2 model and the NSIDC\_Nimbus data (i.e., model minus observation). (c-p) Same as in (b), but for the SINTEX-F3, CESM1-CAM5-SE-LR, CESM1-CAM5-SE-HR, CMCC-CM2-HR4, CMCC-CM2-VHR4, ECMWF-IFS-LR, ECMWF-IFS-MR, ECMWF-IFS-HR, HadGEM3-GC31-LL, HadGEM3-GC31-MM, HadGEM3-GC31-HM, HadGEM3-GC31-HH, MPI-ESM1-2-HR, and MPI-ESM1-2-XR models, respectively. The LR in the bottom left of the panel stands for the low-resolution model, whereas the HR corresponds to the high-resolution model.

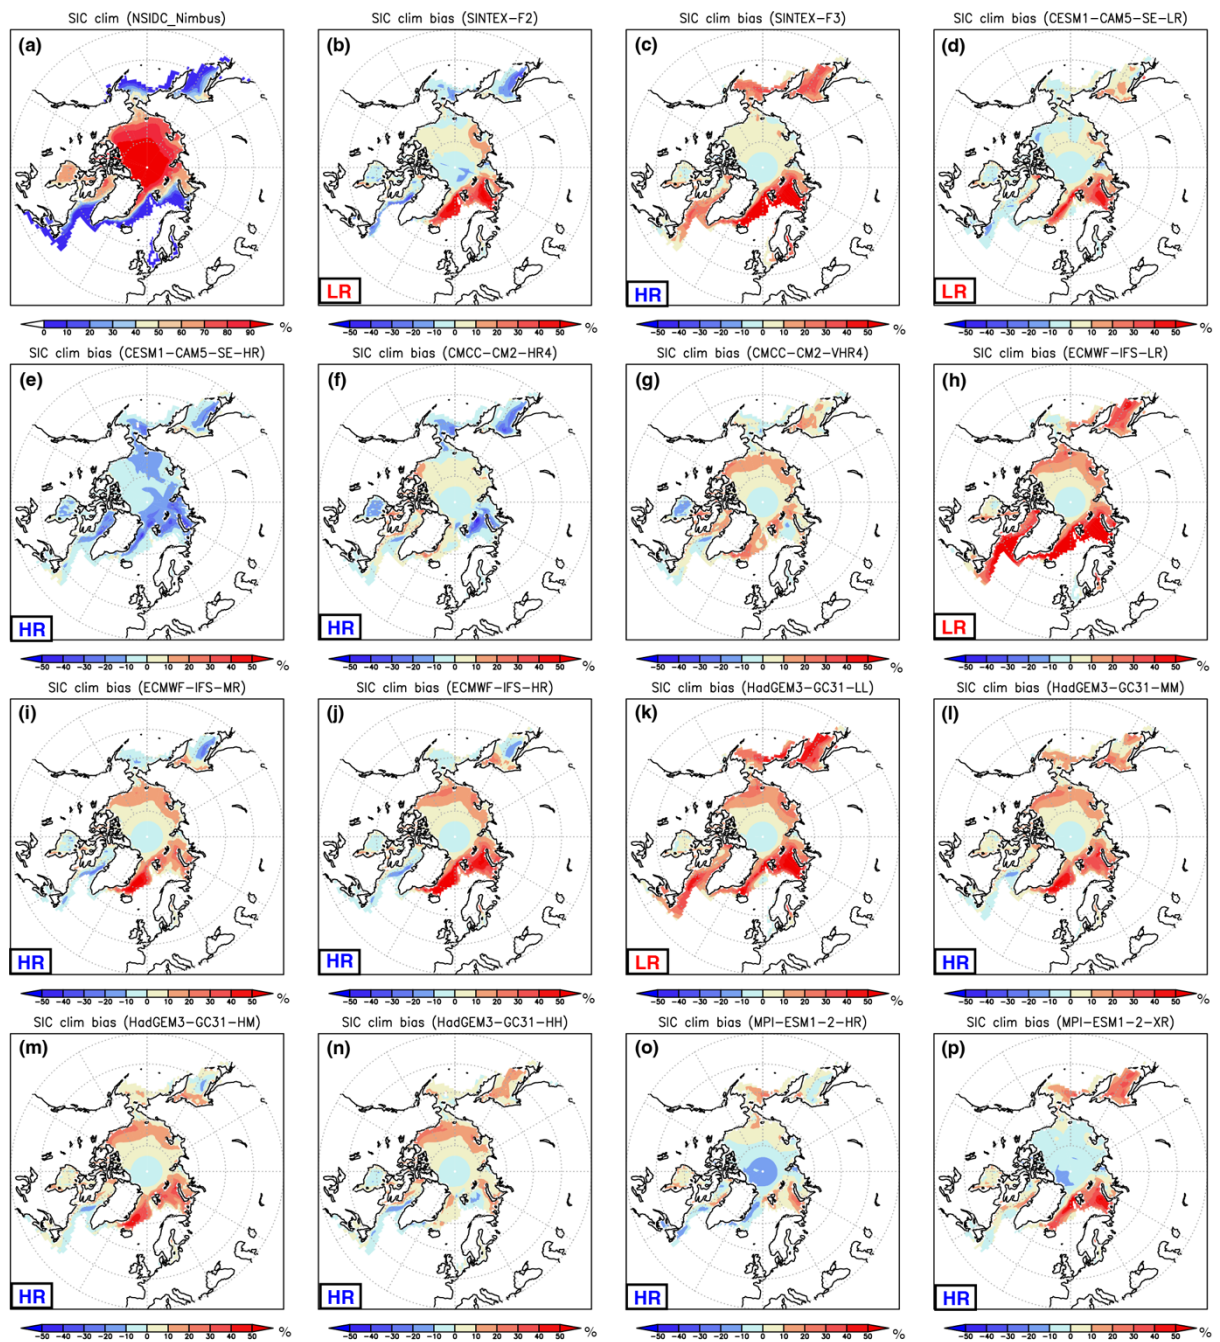

**Supplementary Figure 3** Same as in Fig. S2, but for the Arctic Sea.



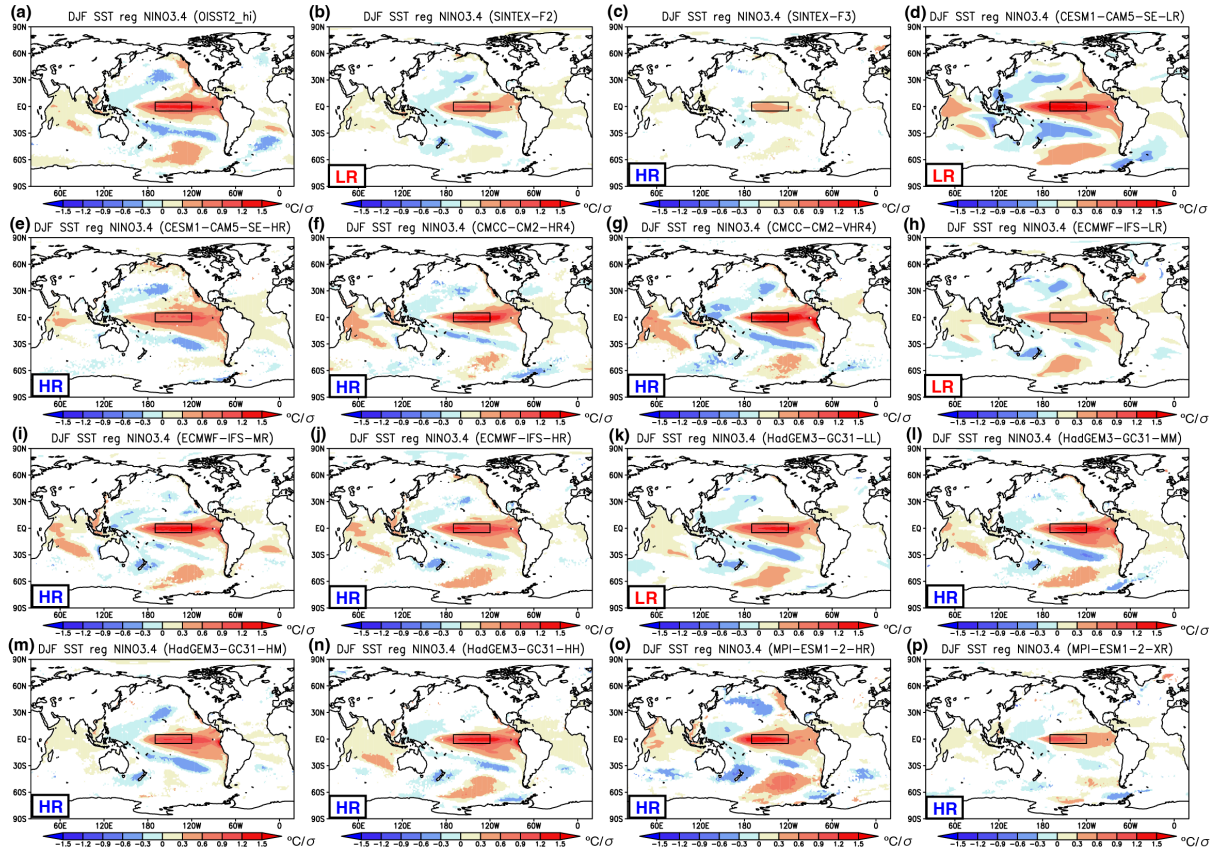

**Supplementary Figure 4** (a) Spatial pattern of December-February mean SST anomalies (in  $^{\circ}\text{C}/\sigma$ ) regressed onto the standardized NINO3.4 index for the OISST2\_hi data. Color indicates a statistically significant value that exceeds 90 % confidence level using a Student's  $t$ -test. A black box indicates a region in which we calculated the NINO3.4 index. (b-p) Same as in (a), but for the SINTEX-F2, SINTEX-F3, CESM1-CAM5-SE-LR, CESM1-CAM5-SE-HR, CMCC-CM2-HR4, CMCC-CM2-VHR4, ECMWF-IFS-LR, ECMWF-IFS-MR, ECMWF-IFS-HR, HadGEM3-GC31-LL, HadGEM3-GC31-MM, HadGEM3-GC31-HM, HadGEM3-GC31-HH, MPI-ESM1-2-HR, and MPI-ESM1-2-XR models, respectively. The LR in the bottom left of the panel stands for the low-resolution model, whereas the HR corresponds to the high-resolution model.

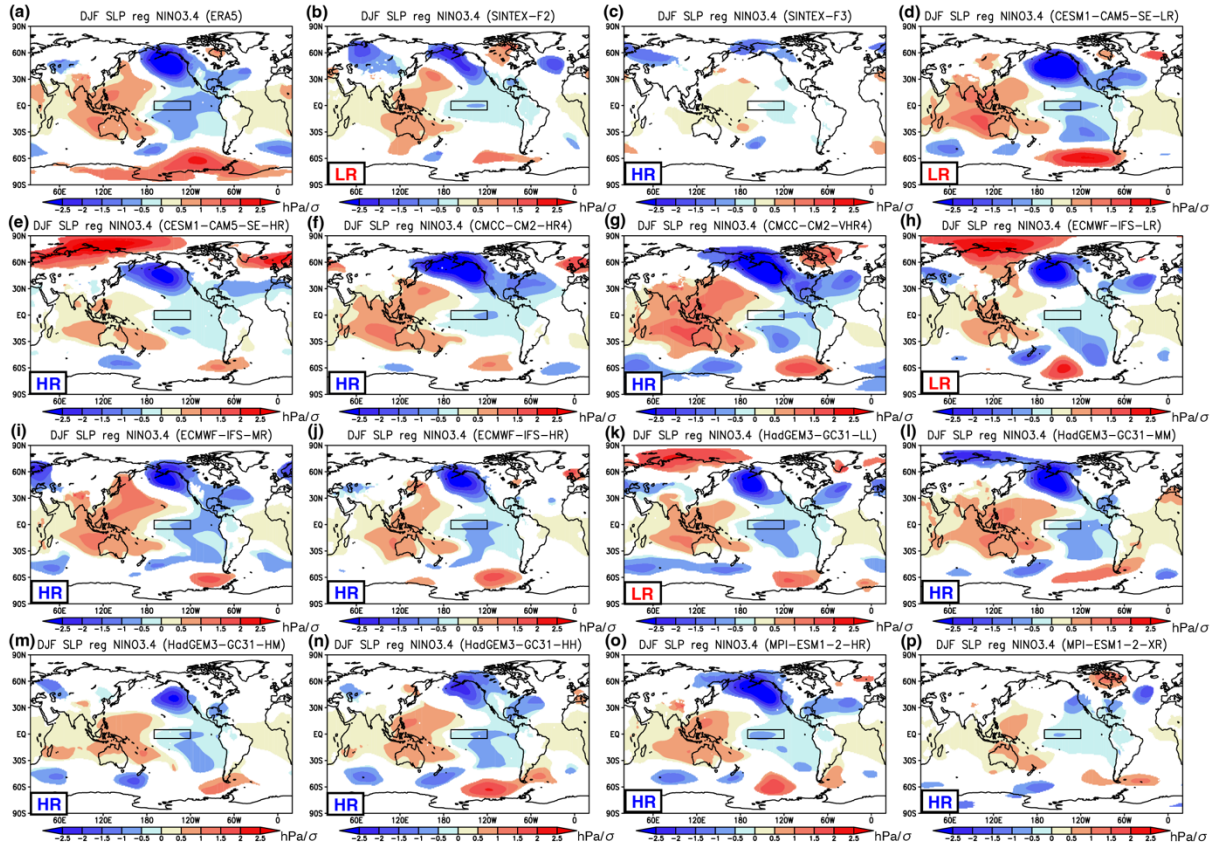

**Supplementary Figure 5** (a) Spatial pattern of December-February mean SLP anomalies (in hPa/  $\sigma$ ) regressed onto the standardized NINO3.4 index for the ERA5 reanalysis product. Color indicates a statistically significant value that exceeds 90 % confidence level using a Student's  $t$ -test. A black box indicates a region in which we calculated the NINO3.4 index. (b-p) Same as in (a), but for the SINTEX-F2, SINTEX-F3, CESM1-CAM5-SE-LR, CESM1-CAM5-SE-HR, CMCC-CM2-HR4, CMCC-CM2-VHR4, ECMWF-IFS-LR, ECMWF-IFS-MR, ECMWF-IFS-HR, HadGEM3-GC31-LL, HadGEM3-GC31-MM, HadGEM3-GC31-HM, HadGEM3-GC31-HH, MPI-ESM1-2-HR, and MPI-ESM1-2-XR models, respectively. The LR in the bottom left of the panel stands for the low-resolution model, whereas the HR corresponds to the high-resolution model.

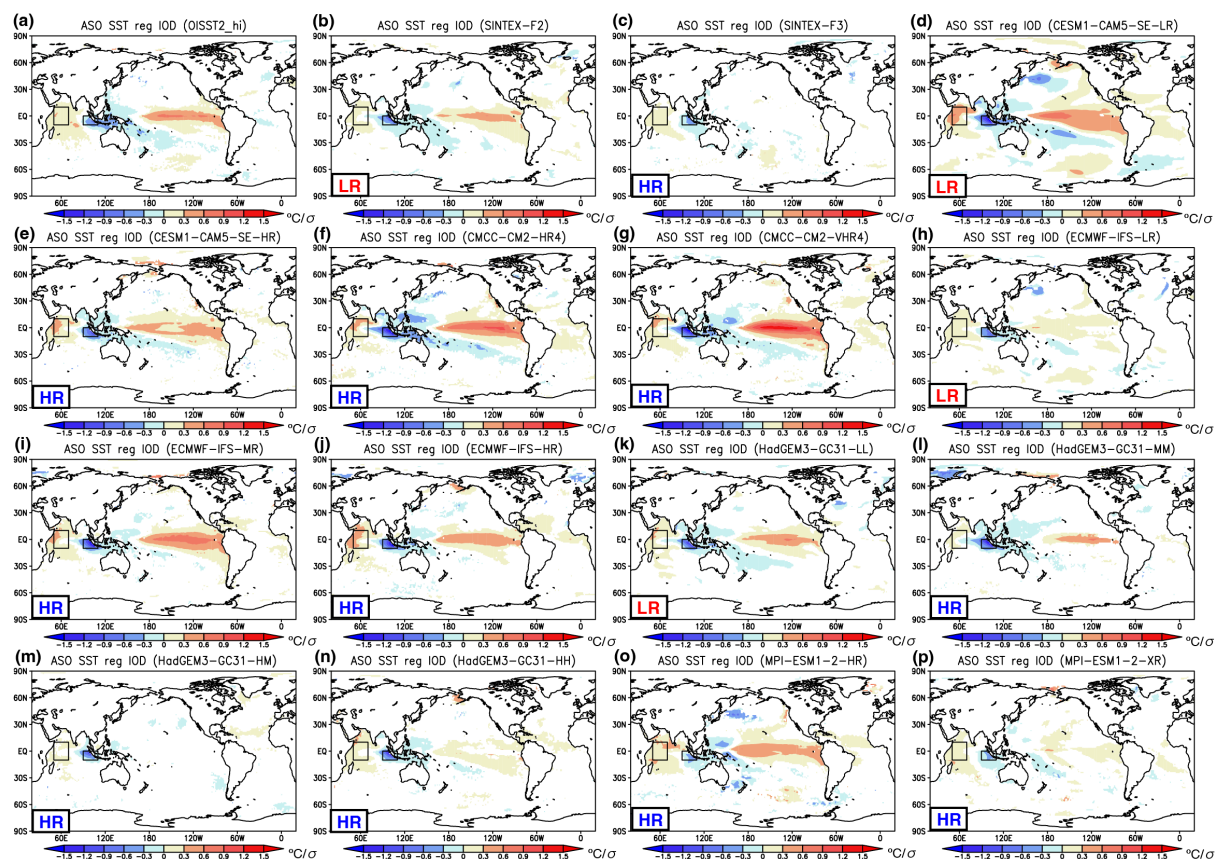

**Supplementary Figure 6** Same as in Fig. S4, for the August-October mean SST anomalies (in  $^{\circ}\text{C}/\sigma$ ) regressed onto the standardized Dipole Mode index of the Indian Ocean Dipole.

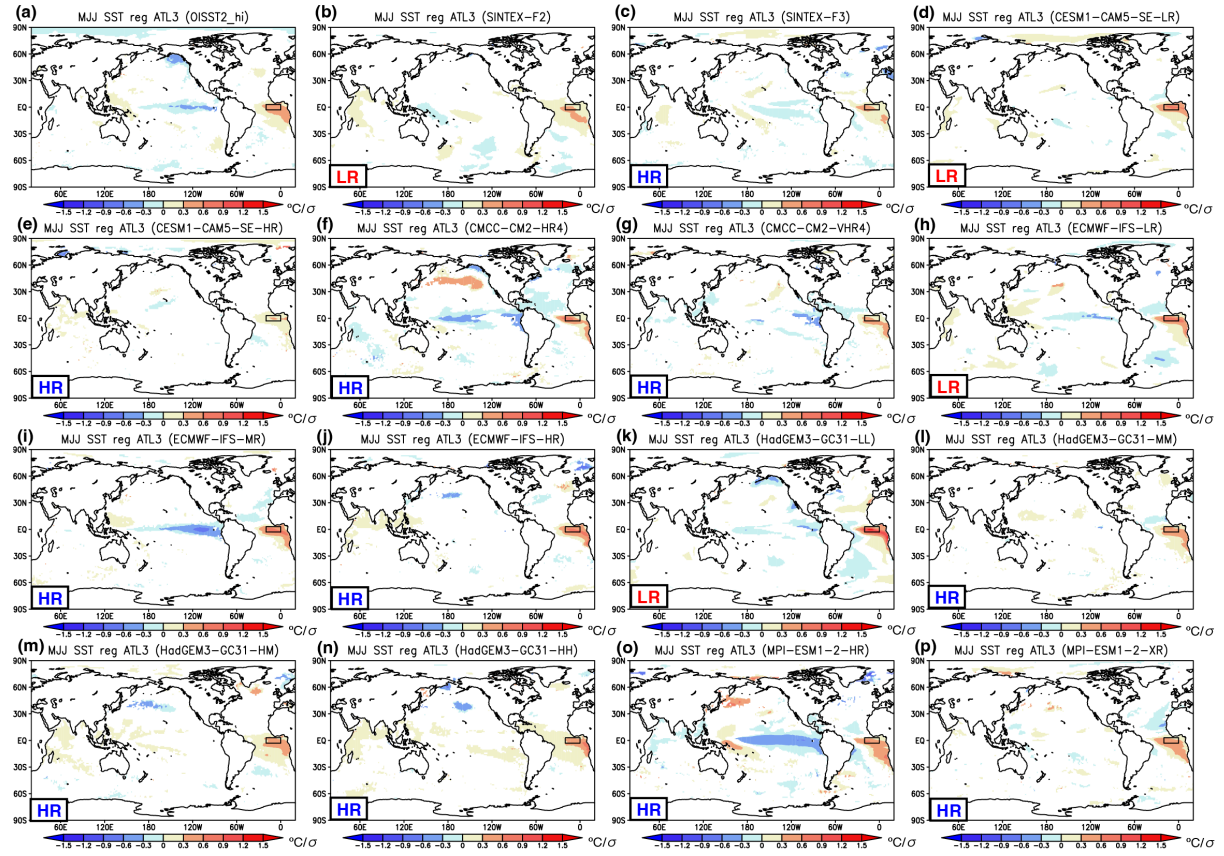

**Supplementary Figure 7** Same as in Fig. S6, for the May-July mean SST anomalies (in  $^{\circ}\text{C}/\sigma$ ) regressed onto the standardized ATL3 index of the Atlantic Niño/Niña.



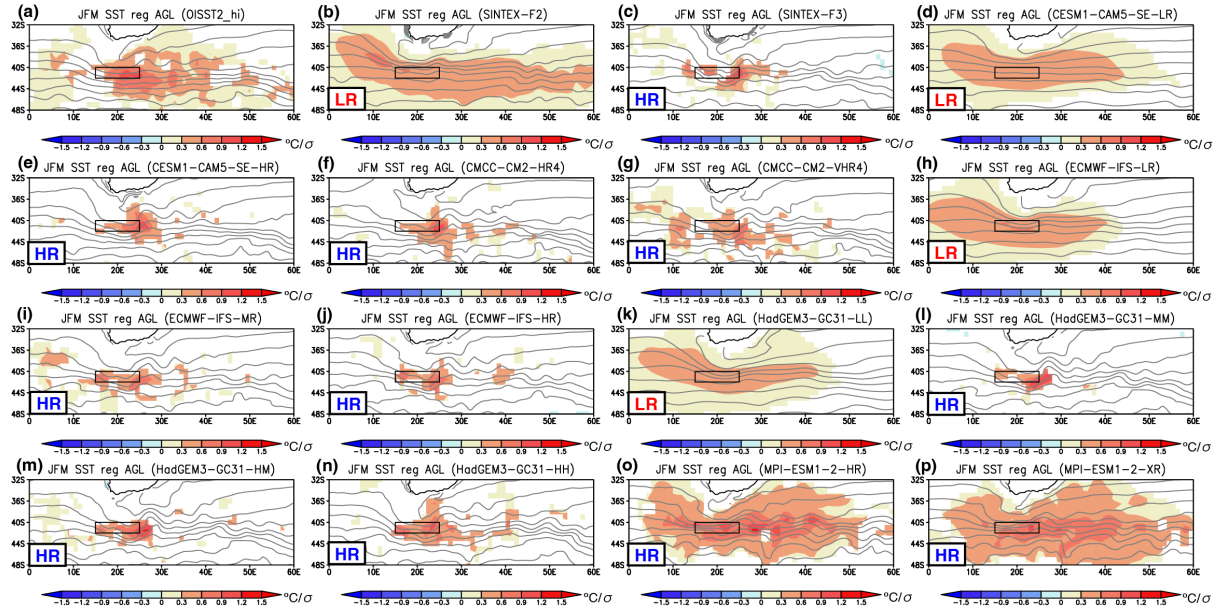

**Supplementary Figure 8** (a) Spatial pattern of January-March mean SST climatology (gray contour, C.I. 2 °C) and SST anomalies (in  $^{\circ}\text{C}/\sigma$ ) regressed onto the standardized SST index over the Agulhas Retroflexion Current (15°E-30°E, 42°S-40°S; black box) region for the OISST2\_hi data. Color indicates a statistically significant value that exceeds 90 % confidence level using a Student's *t*-test. **(b-p)** Same as in (a), but for the SINTEX-F2, SINTEX-F3, CESM1-CAM5-SE-LR, CESM1-CAM5-SE-HR, CMCC-CM2-HR4, CMCC-CM2-VHR4, ECMWF-IFS-LR, ECMWF-IFS-MR, ECMWF-IFS-HR, HadGEM3-GC31-LL, HadGEM3-GC31-MM, HadGEM3-GC31-HM, HadGEM3-GC31-HH, MPI-ESM1-2-HR, and MPI-ESM1-2-XR models, respectively. The LR in the bottom left of the panel stands for the low-resolution model, whereas the HR corresponds to the high-resolution model.

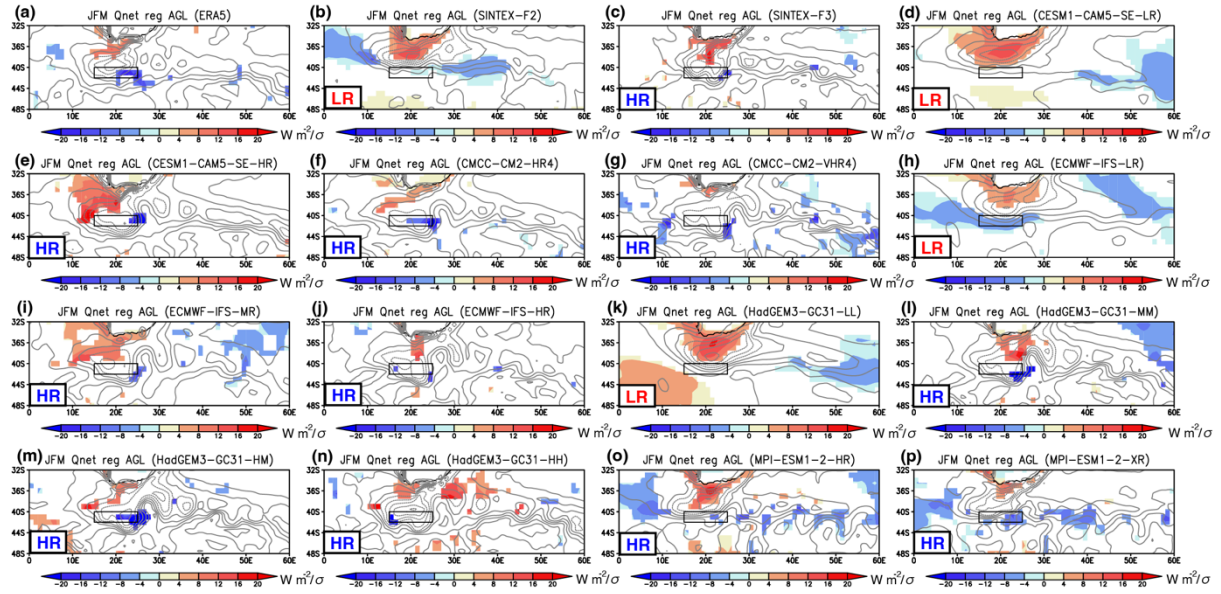

**Supplementary Figure 9** (a) Spatial pattern of January-March mean net surface heat flux climatology (gray contour, C.I.  $30 \text{ W m}^{-2}/\sigma$ ) and net surface heat flux anomalies (in  $\text{W m}^{-2}/\sigma$ ) regressed onto the standardized SST index over the Agulhas Retroflection Current ( $15^{\circ}\text{E}$ - $30^{\circ}\text{E}$ ,  $42^{\circ}\text{S}$ - $40^{\circ}\text{S}$ ; black box) region for the ERA5 reanalysis product. Color indicates a statistically significant value that exceeds 80 % confidence level using a Student's  $t$ -test. Positive values indicate the heat going into the ocean. (b-p) Same as in (a), but for the SINTEX-F2, SINTEX-F3, CESM1-CAM5-SE-LR, CESM1-CAM5-SE-HR, CMCC-CM2-HR4, CMCC-CM2-VHR4, ECMWF-IFS-LR, ECMWF-IFS-MR, ECMWF-IFS-HR, HadGEM3-GC31-LL, HadGEM3-GC31-MM, HadGEM3-GC31-HM, HadGEM3-GC31-HH, MPI-ESM1-2-HR, and MPI-ESM1-2-XR models, respectively. The LR in the bottom left of the panel stands for the low-resolution model, whereas the HR corresponds to the high-resolution model.

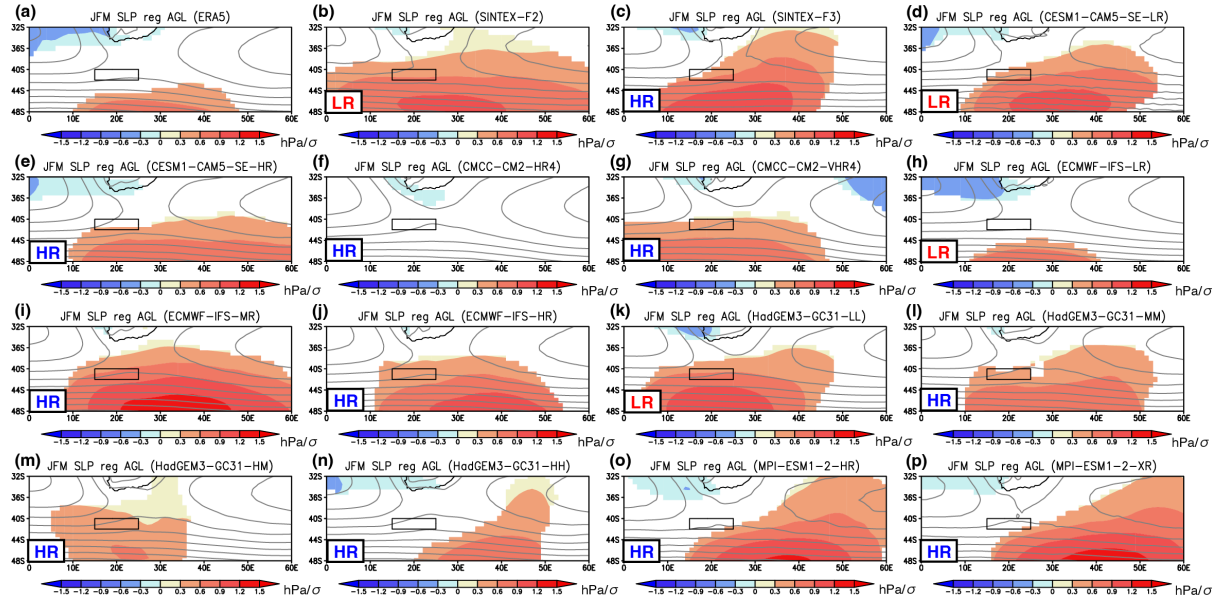

**Supplementary Figure 10** (a) Spatial pattern of January-March mean SLP climatology (gray contour, C.I. 2 hPa) and SLP anomalies (in  $\text{hPa}/\sigma$ ) regressed onto the standardized SST index over the Agulhas Retroflection Current ( $15^{\circ}\text{E}$ - $30^{\circ}\text{E}$ ,  $42^{\circ}\text{S}$ - $40^{\circ}\text{S}$ ; black box) region for the ERA5 reanalysis product. Color indicates a statistically significant value that exceeds 90 % confidence level using a Student's  $t$ -test. (b-p) Same as in (a), but for the SINTEX-F2, SINTEX-F3, CESM1-CAM5-SE-LR, CESM1-CAM5-SE-HR, CMCC-CM2-HR4, CMCC-CM2-VHR4, ECMWF-IFS-LR, ECMWF-IFS-MR, ECMWF-IFS-HR, HadGEM3-GC31-LL, HadGEM3-GC31-MM, HadGEM3-GC31-HM, HadGEM3-GC31-HH, MPI-ESM1-2-HR, and MPI-ESM1-2-XR models, respectively. The LR in the bottom left of the panel stands for the low-resolution model, whereas the HR corresponds to the high-resolution model.

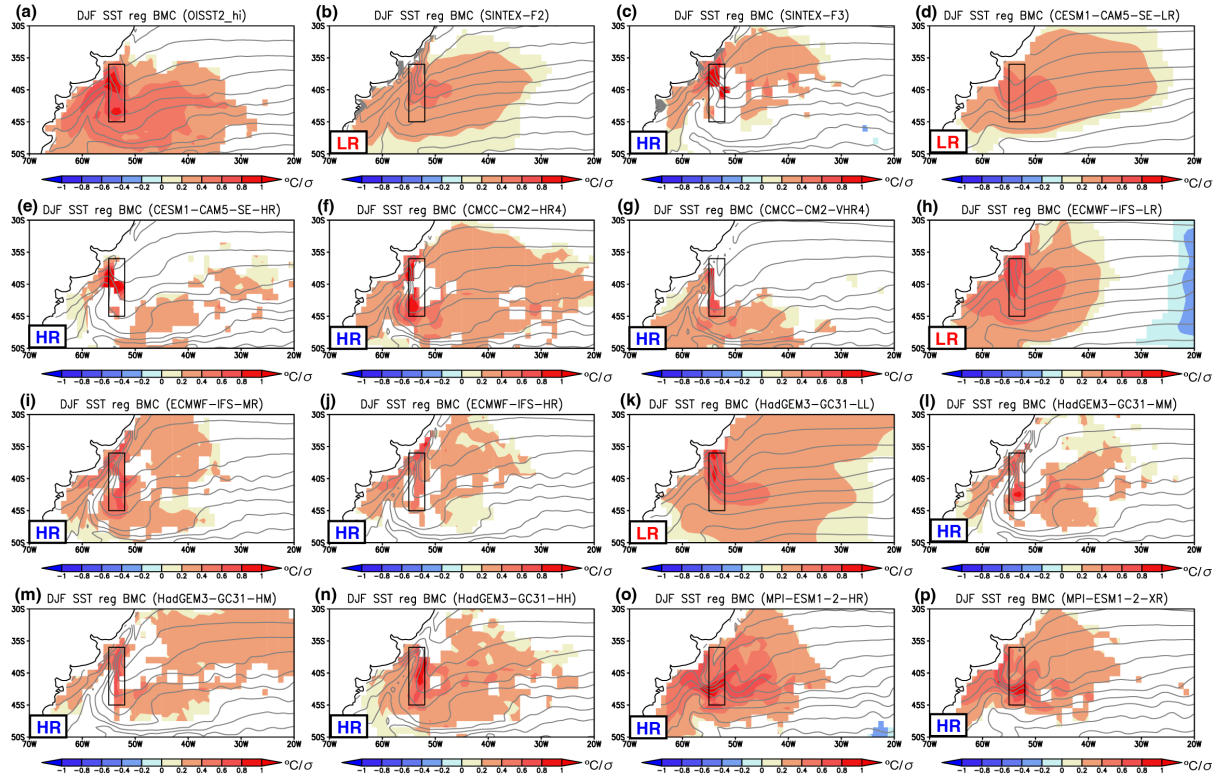

**Supplementary Figure 11** (a) Spatial pattern of December-February mean SST climatology (gray contour, C.I. 2 °C) and SST anomalies (in °C/  $\sigma$ ) regressed onto the standardized SST index over the Brazil-Malvinas Current (55°W-52°W, 45°S-36°S) region for the OISST2\_hi data. Color indicates a statistically significant value that exceeds 90 % confidence level using a Student's *t*-test. (b-p) Same as in (a), but for the SINTEX-F2, SINTEX-F3, CESM1-CAM5-SE-LR, CESM1-CAM5-SE-HR, CMCC-CM2-HR4, CMCC-CM2-VHR4, ECMWF-IFS-LR, ECMWF-IFS-MR, ECMWF-IFS-HR, HadGEM3-GC31-LL, HadGEM3-GC31-MM, HadGEM3-GC31-HM, HadGEM3-GC31-HH, MPI-ESM1-2-HR, and MPI-ESM1-2-XR models, respectively. The LR in the bottom left of the panel stands for the low-resolution model, whereas the HR corresponds to the high-resolution model.



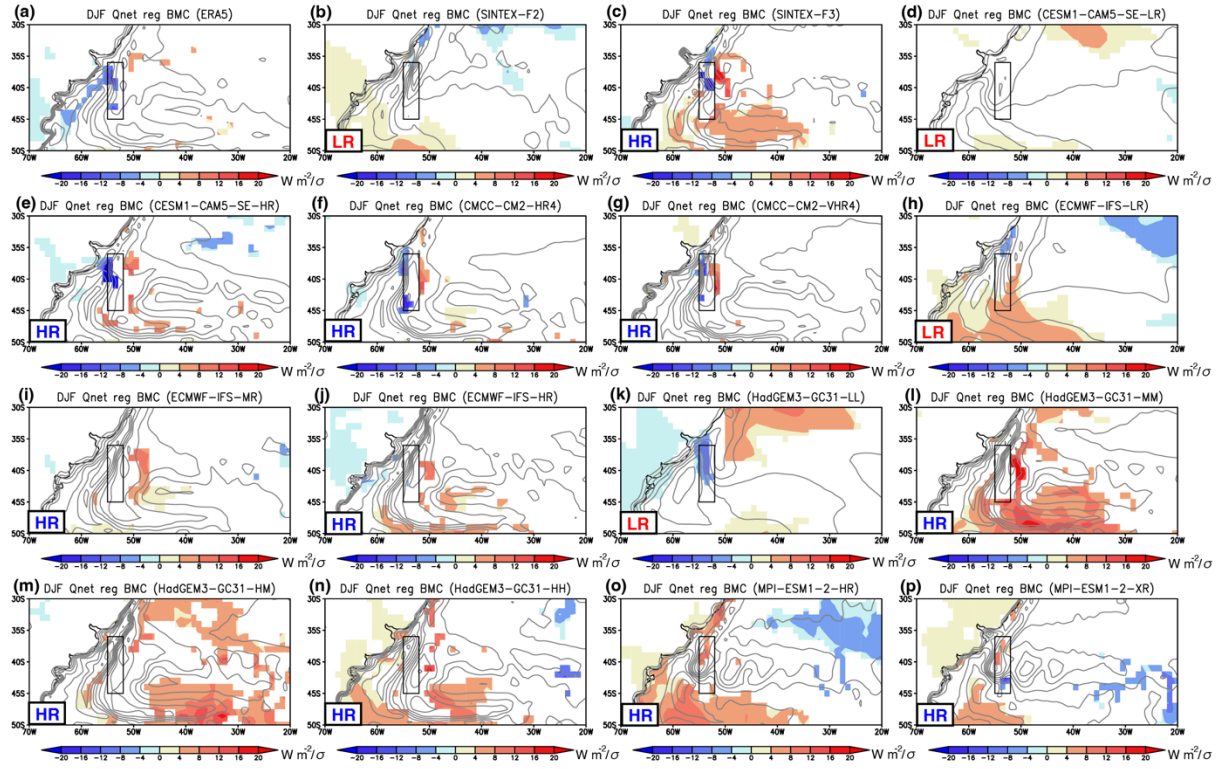

**Supplementary Figure 12 (a)** Spatial pattern of December-February mean net surface heat flux climatology (gray contour, C.I.  $30 \text{ W m}^{-2}/\sigma$ ) and net surface heat flux anomalies (in  $\text{W m}^{-2}/\sigma$ ) regressed onto the standardized SST index over the Brazil-Malvinas Current ( $55^{\circ}\text{W}$ - $52^{\circ}\text{W}$ ,  $45^{\circ}\text{S}$ - $36^{\circ}\text{S}$ ) region for the ERA5 reanalysis product. Color indicates a statistically significant value that exceeds 80 % confidence level using a Student's  $t$ -test. Positive values indicate the heat going into the ocean. **(b-p)** Same as in (a), but for the SINTEX-F2, SINTEX-F3, CESM1-CAM5-SE-LR, CESM1-CAM5-SE-HR, CMCC-CM2-HR4, CMCC-CM2-VHR4, ECMWF-IFS-LR, ECMWF-IFS-MR, ECMWF-IFS-HR, HadGEM3-GC31-LL, HadGEM3-GC31-MM, HadGEM3-GC31-HM, HadGEM3-GC31-HH, MPI-ESM1-2-HR, and MPI-ESM1-2-XR models, respectively. The LR in the bottom left of the panel stands for the low-resolution model, whereas the HR corresponds to the high-resolution model.

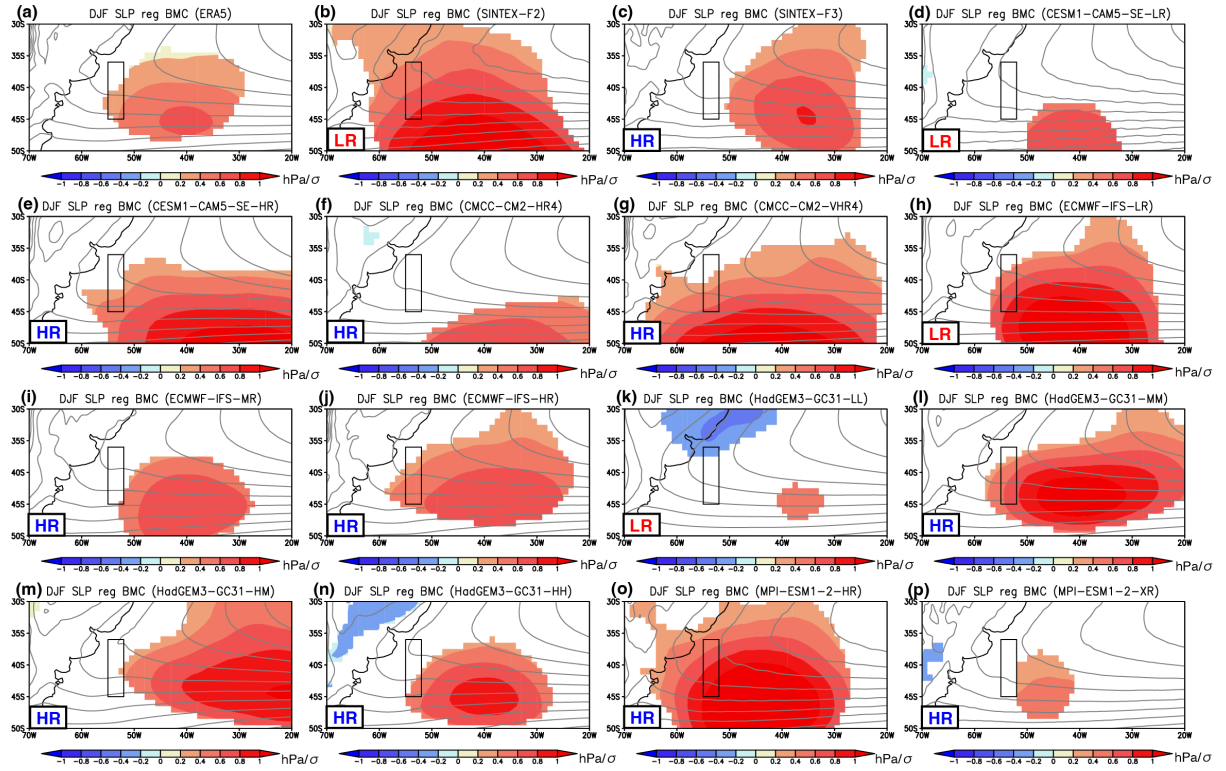

**Supplementary Figure 13** (a) Spatial pattern of December-February mean SLP climatology (gray contour, C.I. 2 hPa) and SLP anomalies (in  $\text{hPa}/\sigma$ ) regressed onto the standardized SST index over the Brazil-Malvinas Current ( $55^\circ\text{W}$ - $52^\circ\text{W}$ ,  $45^\circ\text{S}$ - $36^\circ\text{S}$ ) region for the ERA5 reanalysis product. Color indicates a statistically significant value that exceeds 90 % confidence level using a Student's  $t$ -test. (b-p) Same as in (a), but for the SINTEX-F2, SINTEX-F3, CESM1-CAM5-SE-LR, CESM1-CAM5-SE-HR, CMCC-CM2-HR4, CMCC-CM2-VHR4, ECMWF-IFS-LR, ECMWF-IFS-MR, ECMWF-IFS-HR, HadGEM3-GC31-LL, HadGEM3-GC31-MM, HadGEM3-GC31-HM, HadGEM3-GC31-HH, MPI-ESM1-2-HR, and MPI-ESM1-2-XR models, respectively. The LR in the bottom left of the panel stands for the low-resolution model, whereas the HR corresponds to the high-resolution model.

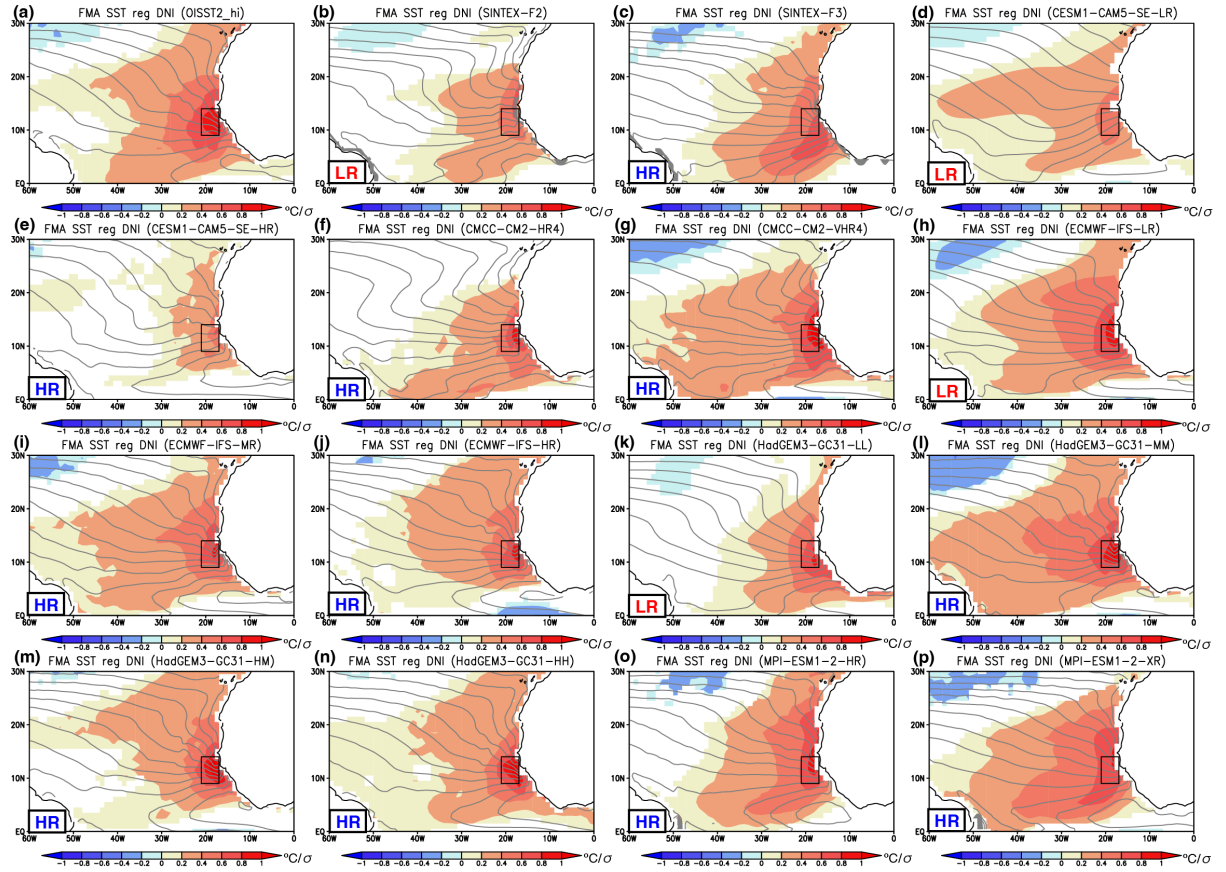

**Supplementary Figure 14** (a) Spatial pattern of February-April mean SST climatology (gray contour, C.I. 1 °C) and SST anomalies (in  $^{\circ}\text{C}/\sigma$ ) regressed onto the standardized Dakar Niño/Niña SST index (DNI; 21°W-17°W, 9°N-14°N in a black box) for the OISST2\_hi dataset. Color indicates a statistically significant value that exceeds 90 % confidence level using a Student's *t*-test. (b-p) Same as in (a), but for the SINTEX-F2, SINTEX-F3, CESM1-CAM5-SE-LR, CESM1-CAM5-SE-HR, CMCC-CM2-HR4, CMCC-CM2-VHR4, ECMWF-IFS-LR, ECMWF-IFS-MR, ECMWF-IFS-HR, HadGEM3-GC31-LL, HadGEM3-GC31-MM, HadGEM3-GC31-HM, HadGEM3-GC31-HH, MPI-ESM1-2-HR, and MPI-ESM1-2-XR models, respectively. The LR in the bottom left of the panel stands for the low-resolution model, whereas the HR corresponds to the high-resolution model.

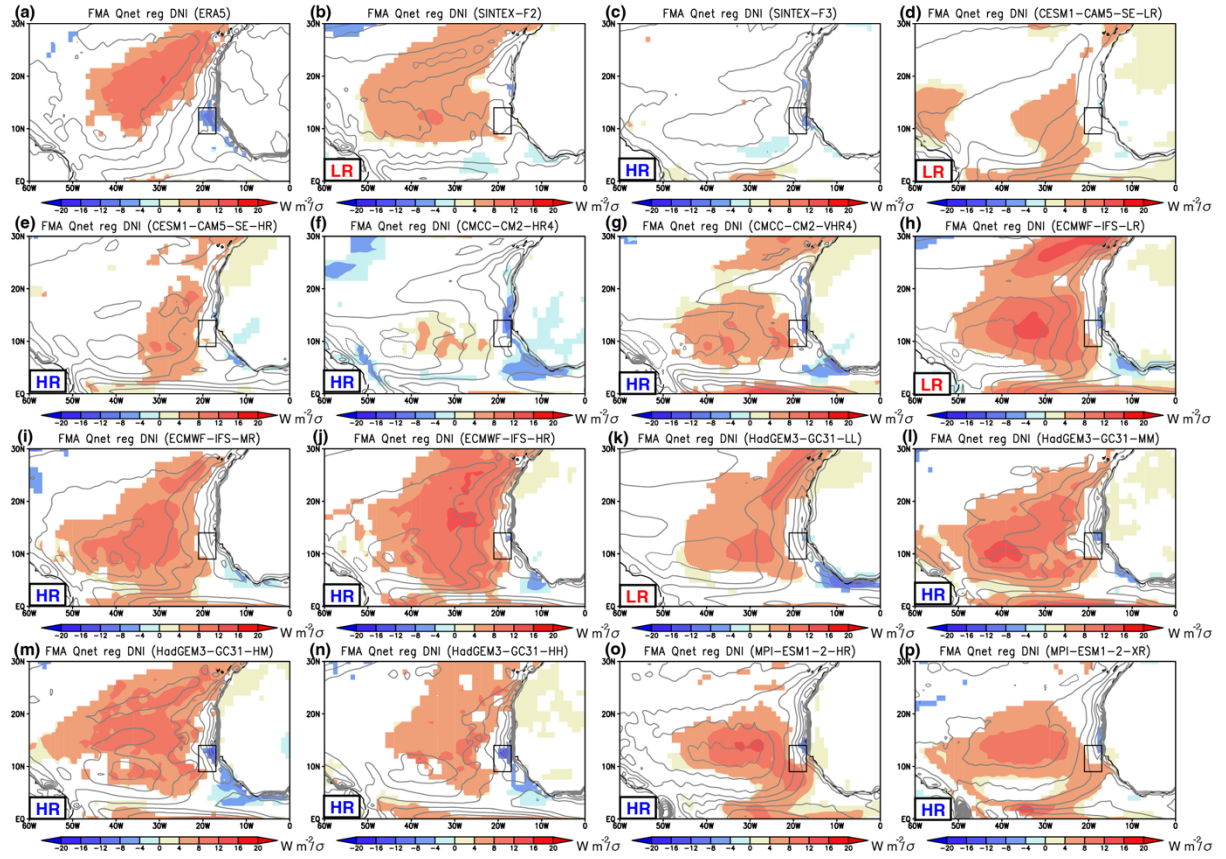

**Supplementary Figure 15 (a)** Spatial pattern of February-April mean net surface heat flux climatology (gray contour, C.I.  $20 \text{ W m}^{-2}/\sigma$ ) and net surface heat flux anomalies (in  $\text{W m}^{-2}/\sigma$ ) regressed onto the standardized Dakar Niño/Niña SST index (DNI;  $21^{\circ}\text{W}$ - $17^{\circ}\text{W}$ ,  $9^{\circ}\text{N}$ - $14^{\circ}\text{N}$  in a black box) for the ERA5 reanalysis product. Color indicates a statistically significant value that exceeds 80 % confidence level using a Student's  $t$ -test. Positive values indicate the heat going into the ocean. **(b-p)** Same as in (a), but for the SINTEX-F2, SINTEX-F3, CESM1-CAM5-SE-LR, CESM1-CAM5-SE-HR, CMCC-CM2-HR4, CMCC-CM2-VHR4, ECMWF-IFS-LR, ECMWF-IFS-MR, ECMWF-IFS-HR, HadGEM3-GC31-LL, HadGEM3-GC31-MM, HadGEM3-GC31-HM, HadGEM3-GC31-HH, MPI-ESM1-2-HR, and MPI-ESM1-2-XR models, respectively. The LR in the bottom left of the panel stands for the low-resolution model, whereas the HR corresponds to the high-resolution model.



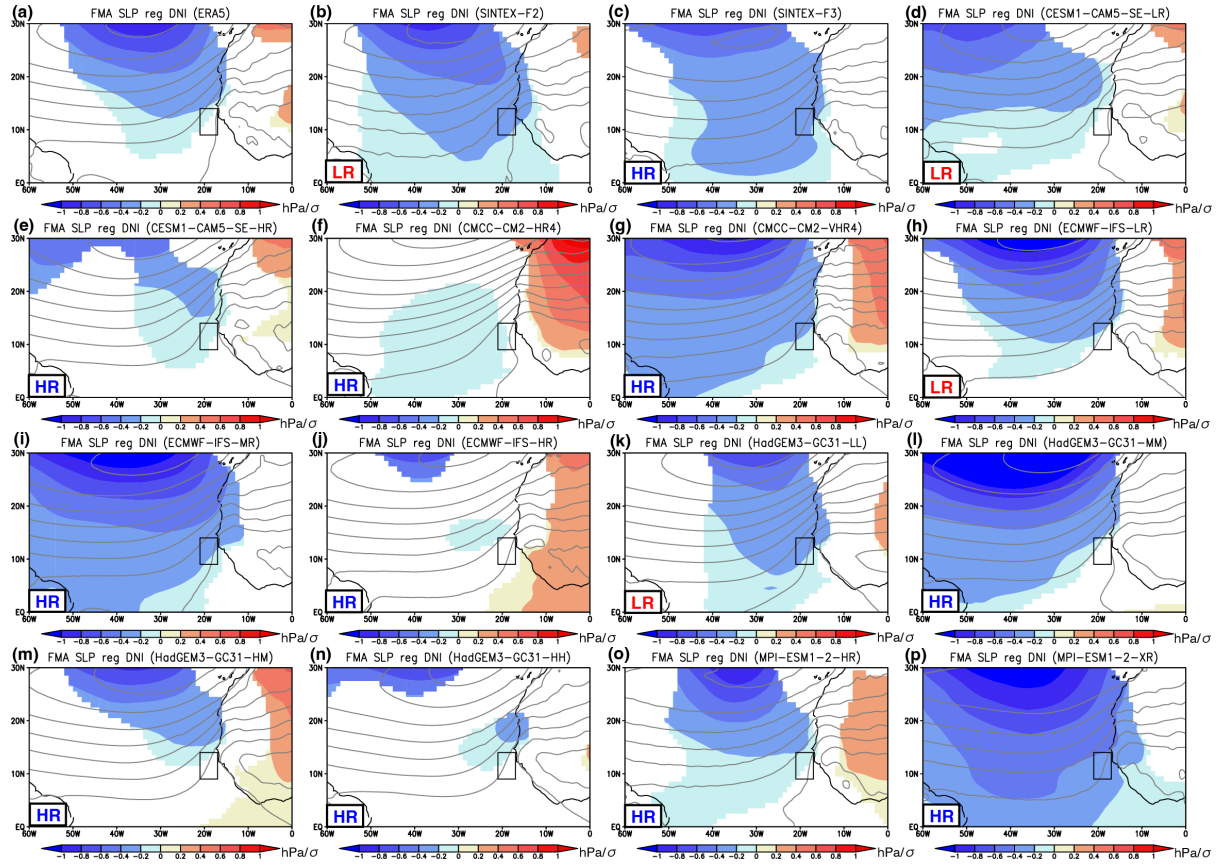

**Supplementary Figure 16** (a) Spatial pattern of February-April mean SLP climatology (gray contour, C.I. 1.5 hPa) and SLP anomalies (in  $\text{hPa}/\sigma$ ) regressed onto the standardized Dakar Niño/Niña SST index (DNI;  $21^{\circ}\text{W}$ - $17^{\circ}\text{W}$ ,  $9^{\circ}\text{N}$ - $14^{\circ}\text{N}$  in a black box) for the ERA5 reanalysis product. Color indicates a statistically significant value that exceeds 90 % confidence level using a Student's  $t$ -test. (b-p) Same as in (a), but for the SINTEX-F2, SINTEX-F3, CESM1-CAM5-SE-LR, CESM1-CAM5-SE-HR, CMCC-CM2-HR4, CMCC-CM2-VHR4, ECMWF-IFS-LR, ECMWF-IFS-MR, ECMWF-IFS-HR, HadGEM3-GC31-LL, HadGEM3-GC31-MM, HadGEM3-GC31-HM, HadGEM3-GC31-HH, MPI-ESM1-2-HR, and MPI-ESM1-2-XR models, respectively. The LR in the bottom left of the panel stands for the low-resolution model, whereas the HR corresponds to the high-resolution model.

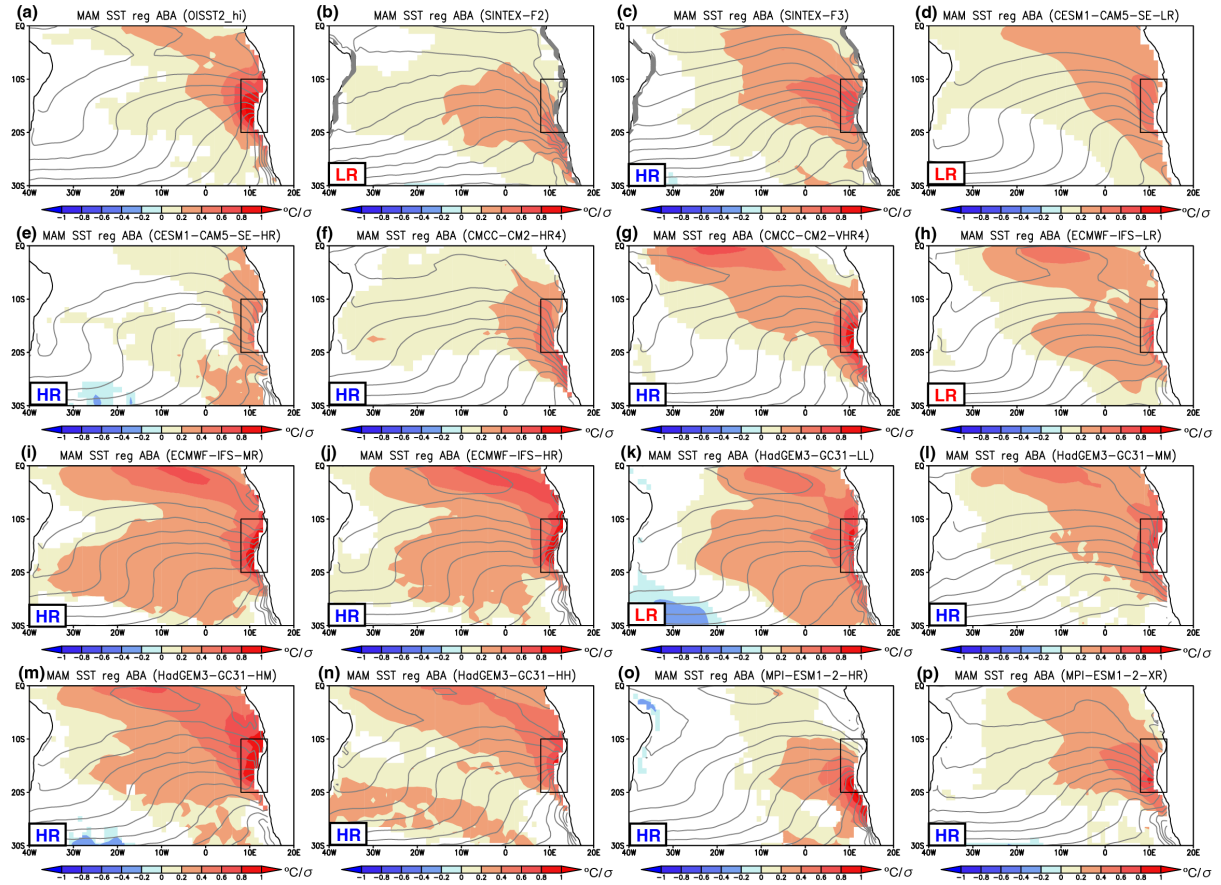

**Supplementary Figure 17** (a) Spatial pattern of March-May mean SST climatology (gray contour, C.I. 1 °C) and SST anomalies (in  $^{\circ}\text{C}/\sigma$ ) regressed onto the standardized Benguela Niño/Niña SST index (ABA; 8°E-14°E, 20°S-10°S in a black box) for the OISST2\_hi dataset. Color indicates a statistically significant value that exceeds 90 % confidence level using a Student's *t*-test. (b-p) Same as in (a), but for the SINTEX-F2, SINTEX-F3, CESM1-CAM5-SE-LR, CESM1-CAM5-SE-HR, CMCC-CM2-HR4, CMCC-CM2-VHR4, ECMWF-IFS-LR, ECMWF-IFS-MR, ECMWF-IFS-HR, HadGEM3-GC31-LL, HadGEM3-GC31-MM, HadGEM3-GC31-HM, HadGEM3-GC31-HH, MPI-ESM1-2-HR, and MPI-ESM1-2-XR models, respectively. The LR in the bottom left of the panel stands for the low-resolution model, whereas the HR corresponds to the high-resolution model.

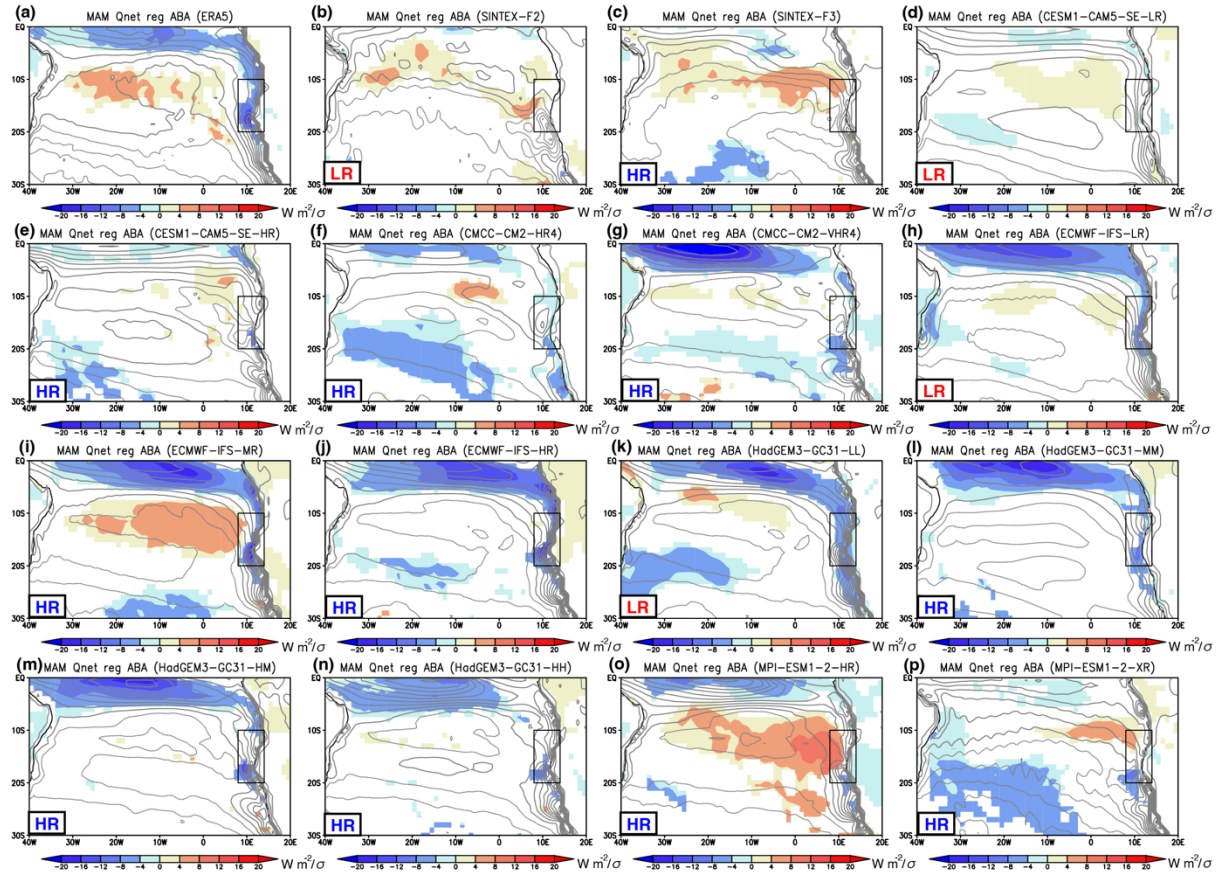

**Supplementary Figure 18** (a) Spatial pattern of March-May mean net surface heat flux climatology (gray contour, C.I.  $15 \text{ W m}^{-2}/\sigma$ ) and net surface heat flux anomalies (in  $\text{W m}^{-2}/\sigma$ ) regressed onto the standardized Benguela Niño/Niña SST index (ABA;  $8^{\circ}\text{E}$ - $14^{\circ}\text{E}$ ,  $20^{\circ}\text{S}$ - $10^{\circ}\text{S}$  in a black box) for the ERA5 reanalysis product. Color indicates a statistically significant value that exceeds 80 % confidence level using a Student's  $t$ -test. Positive values indicate the heat going into the ocean. (b-p) Same as in (a), but for the SINTEX-F2, SINTEX-F3, CESM1-CAM5-SE-LR, CESM1-CAM5-SE-HR, CMCC-CM2-HR4, CMCC-CM2-VHR4, ECMWF-IFS-LR, ECMWF-IFS-MR, ECMWF-IFS-HR, HadGEM3-GC31-LL, HadGEM3-GC31-MM, HadGEM3-GC31-HM, HadGEM3-GC31-HH, MPI-ESM1-2-HR, and MPI-ESM1-2-XR models, respectively. The LR in the bottom left of the panel stands for the low-resolution model, whereas the HR corresponds to the high-resolution model.

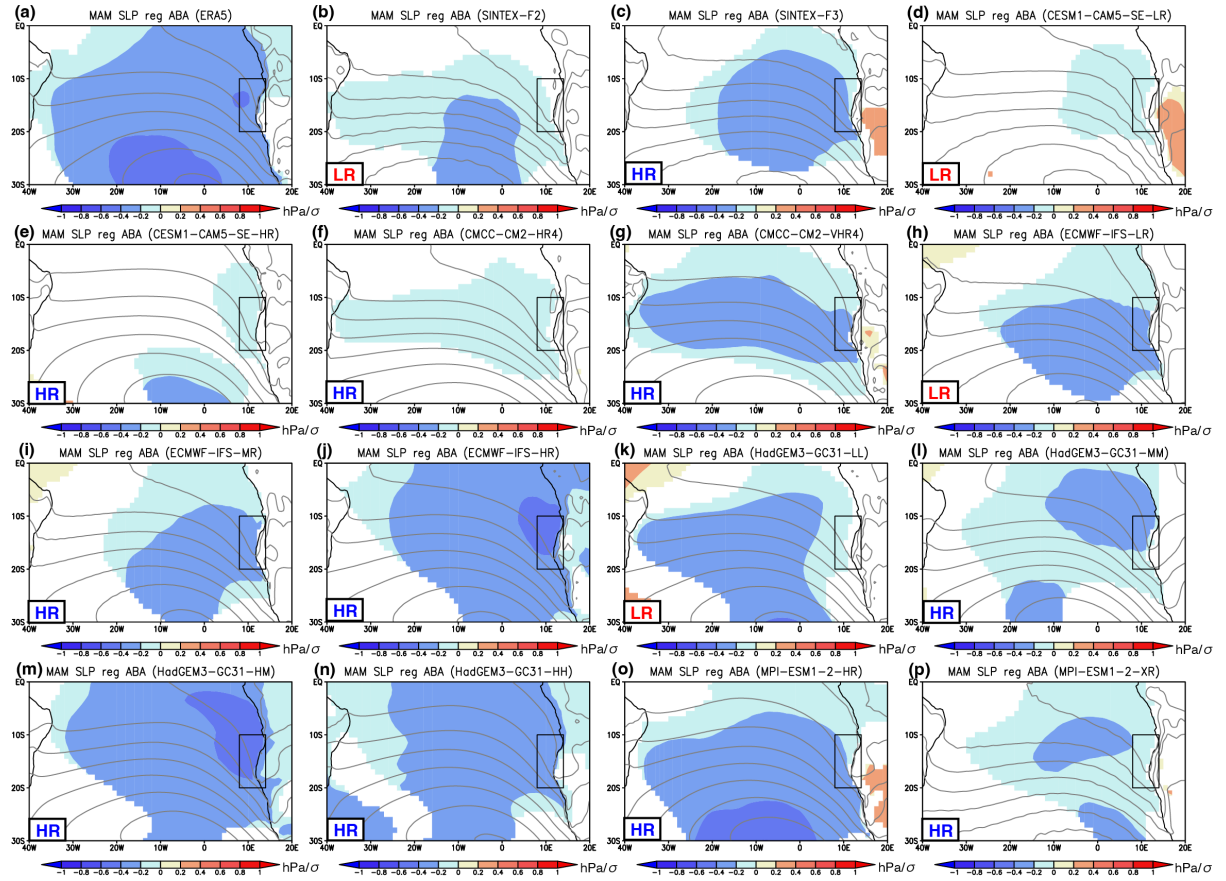

**Supplementary Figure 19** (a) Spatial pattern of March-May mean SLP climatology (gray contour, C.I. 1.5 hPa) and SLP anomalies (in  $\text{hPa}/\sigma$ ) regressed onto the standardized Benguela Niño/Niña SST index (ABA;  $8^{\circ}\text{E}$ - $14^{\circ}\text{E}$ ,  $20^{\circ}\text{S}$ - $10^{\circ}\text{S}$  in a black box) for the ERA5 reanalysis product. Color indicates a statistically significant value that exceeds 90 % confidence level using a Student's  $t$ -test. (b-p) Same as in (a), but for the SINTEX-F2, SINTEX-F3, CESM1-CAM5-SE-LR, CESM1-CAM5-SE-HR, CMCC-CM2-HR4, CMCC-CM2-VHR4, ECMWF-IFS-LR, ECMWF-IFS-MR, ECMWF-IFS-HR, HadGEM3-GC31-LL, HadGEM3-GC31-MM, HadGEM3-GC31-HM, HadGEM3-GC31-HH, MPI-ESM1-2-HR, and MPI-ESM1-2-XR models, respectively. The LR in the bottom left of the panel stands for the low-resolution model, whereas the HR corresponds to the high-resolution model.



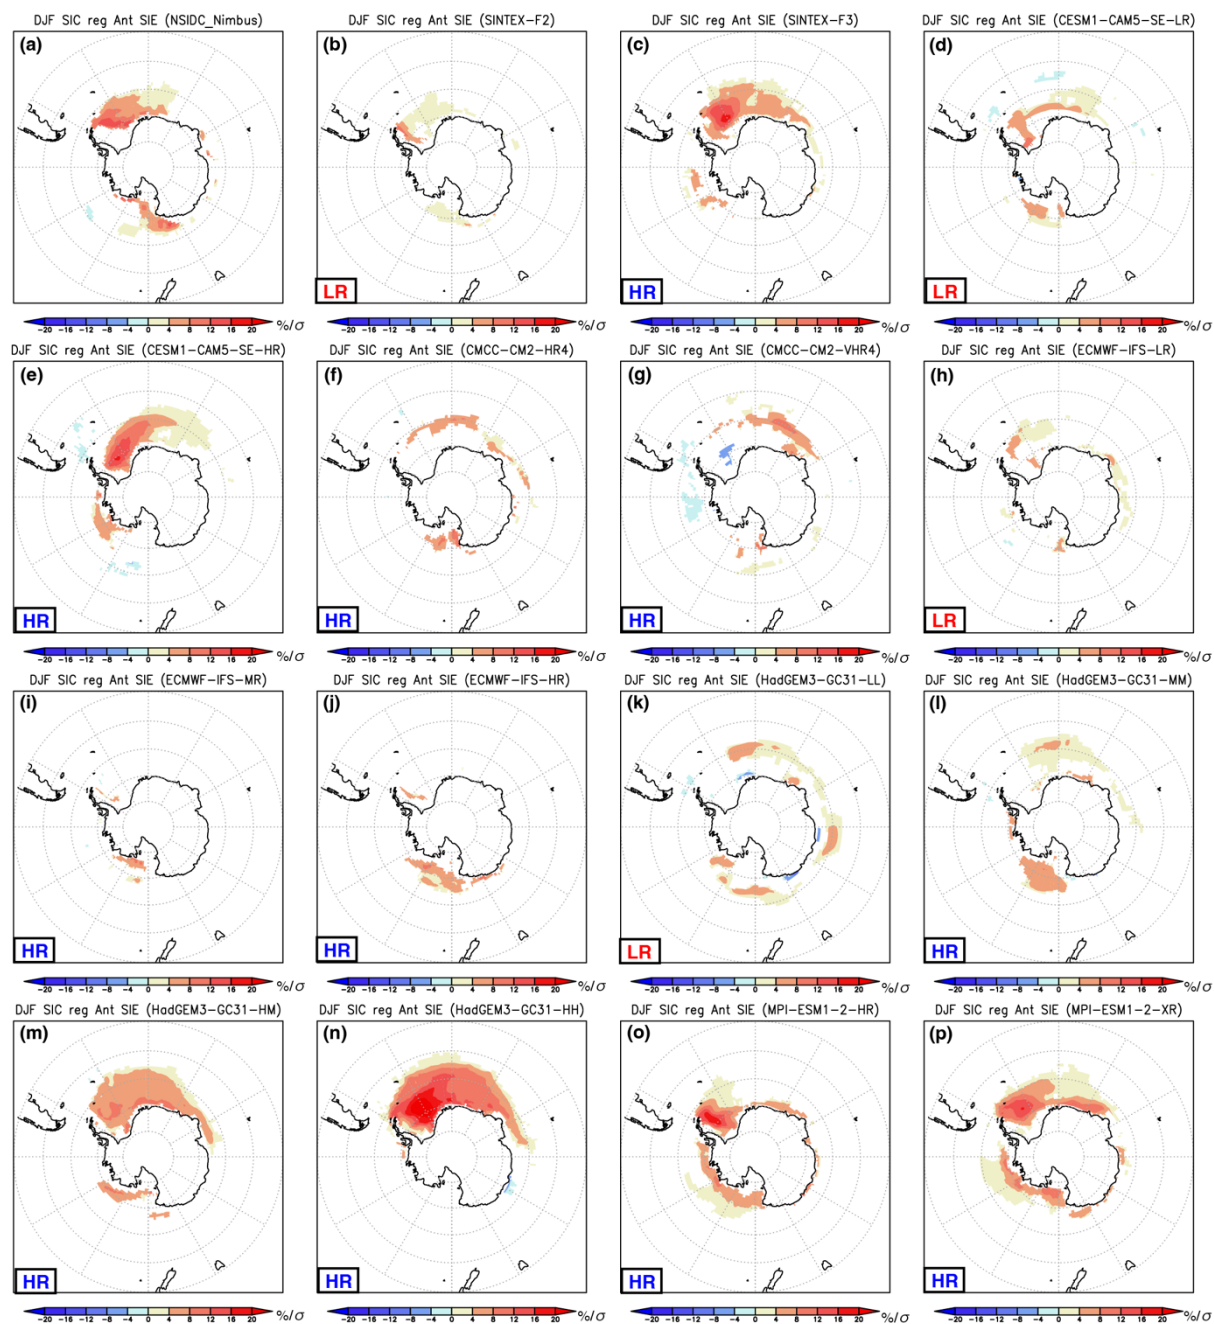

**Supplementary Figure 20** (a) Spatial pattern of December-February mean sea ice concentration anomalies (SIC; in  $\%/\sigma$ ) regressed onto the standardized Antarctic sea ice extent (SIE) anomalies for the NSIDC\_Nimbus data. Color indicates a statistically significant value that exceeds 90 % confidence level using a Student's *t*-test. (b-p) Same as in (a), but for the SINTEX-F2, SINTEX-F3, CESM1-CAM5-SE-LR, CESM1-CAM5-SE-HR, CMCC-CM2-HR4, CMCC-CM2-VHR4, ECMWF-IFS-LR, ECMWF-IFS-MR, ECMWF-IFS-HR, HadGEM3-GC31-LL, HadGEM3-GC31-MM, HadGEM3-GC31-HM, HadGEM3-GC31-HH, MPI-ESM1-2-HR, and MPI-ESM1-2-XR models, respectively. The LR in the bottom left of

242 the panel stands for the low-resolution model, whereas the HR corresponds to the high-  
243 resolution model.  
244

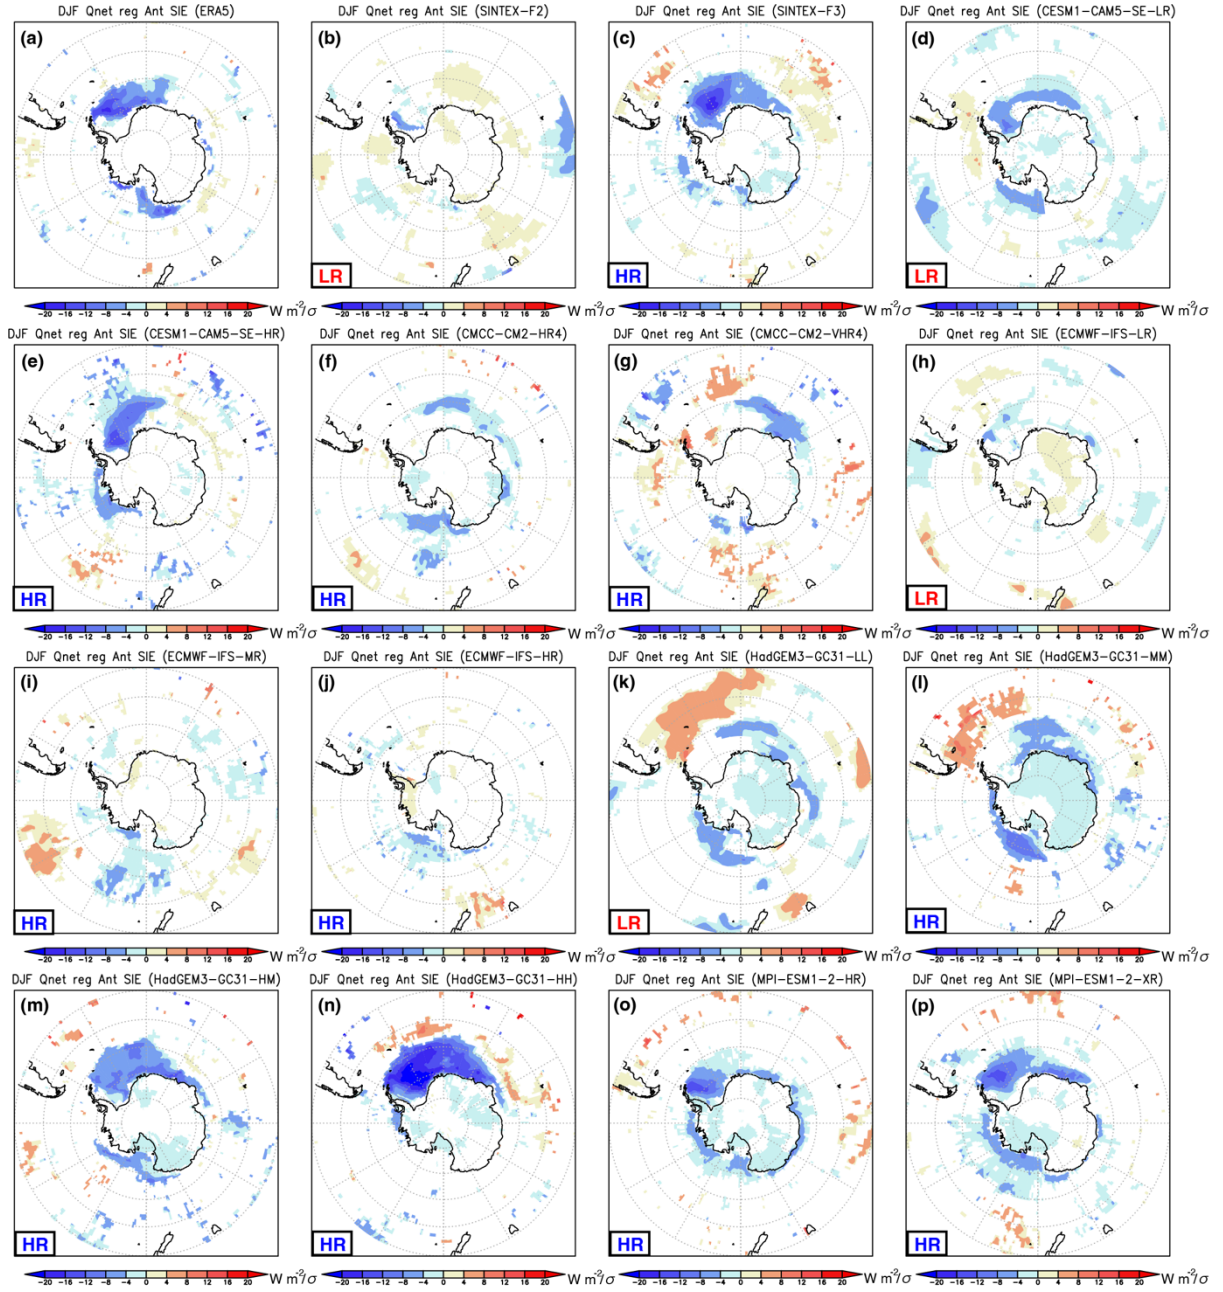

**Supplementary Figure 21 (a)** Spatial pattern of December-February mean net surface heat flux anomalies (in  $\text{W m}^{-2}/\sigma$ ) regressed onto the standardized Antarctic sea ice extent (SIE) anomalies for the NSIDC\_Nimbus data. Color indicates a statistically significant value that exceeds 80 % confidence level using a Student's  $t$ -test. **(b-p)** Same as in (a), but for the SINTEX-F2, SINTEX-F3, CESM1-CAM5-SE-LR, CESM1-CAM5-SE-HR, CMCC-CM2-HR4, CMCC-CM2-VHR4, ECMWF-IFS-LR, ECMWF-IFS-MR, ECMWF-IFS-HR, HadGEM3-GC31-LL, HadGEM3-GC31-MM, HadGEM3-GC31-HM, HadGEM3-GC31-HH, MPI-ESM1-2-HR, and MPI-ESM1-2-XR models, respectively. The LR in the bottom left of the panel stands for the low-resolution model, whereas the HR corresponds to the high-resolution model.

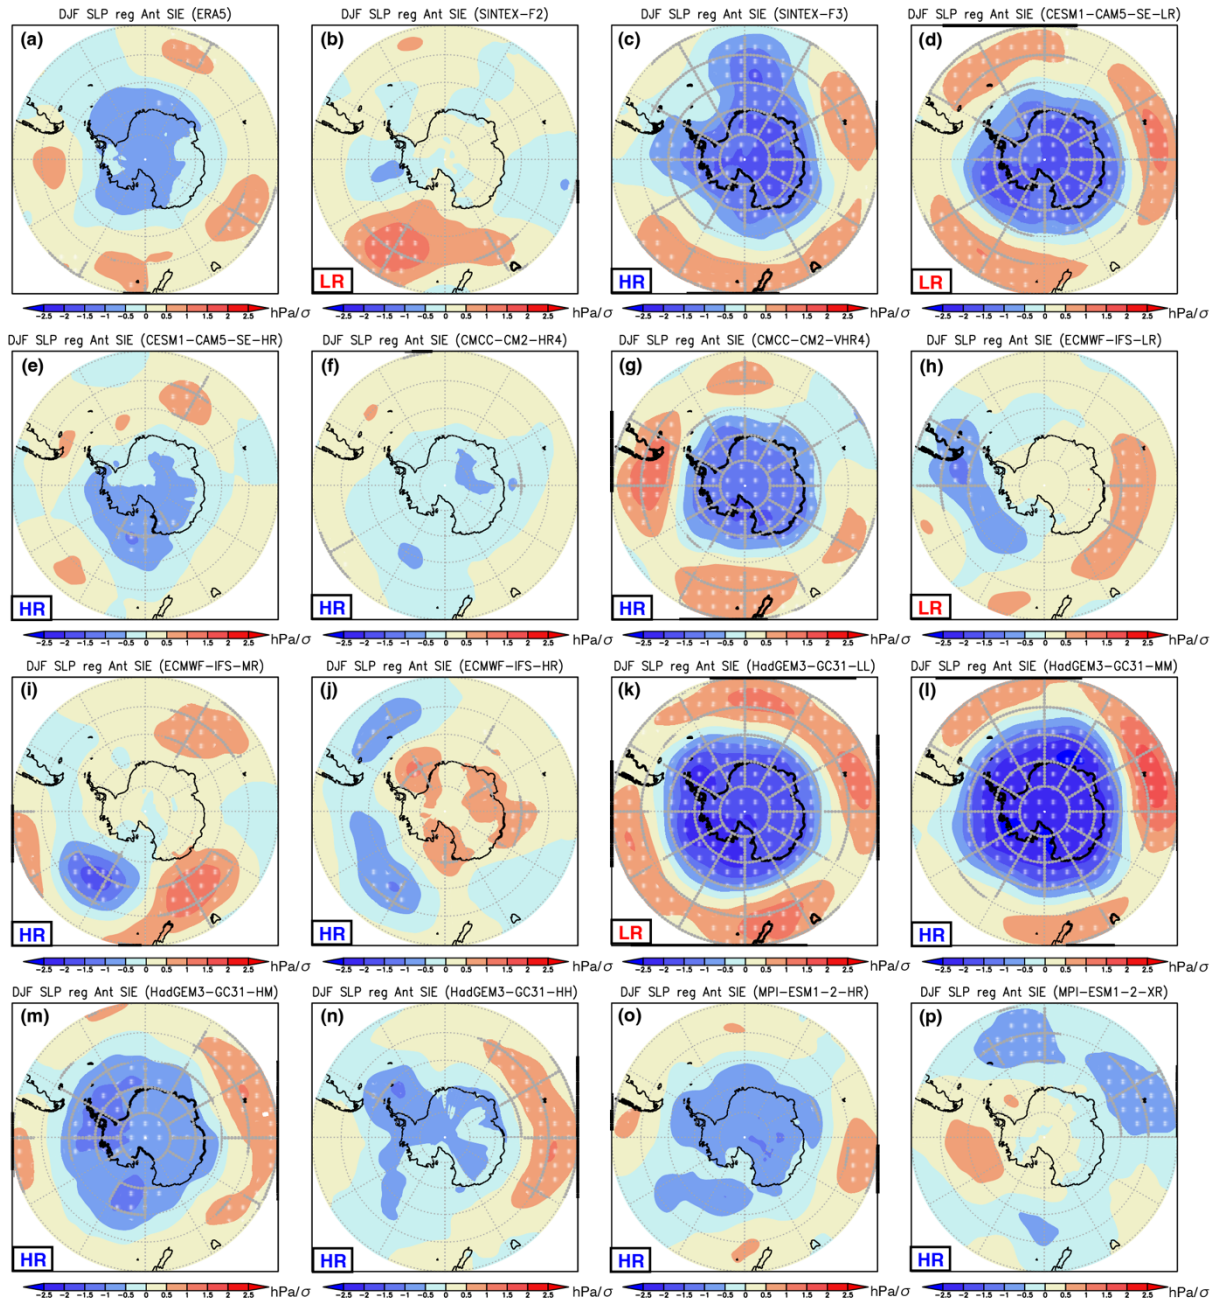

**Supplementary Figure 22** (a) Spatial pattern of December-February mean sea level pressure anomalies (SLP; in  $\text{hPa}/\sigma$ ) regressed onto the standardized Antarctic sea ice extent (SIE) anomalies for the NSIDC\_Nimbus data. A white dot indicate a statistically significant value that exceeds 90 % confidence level using a Student's  $t$ -test. (b-p) Same as in (a), but for the SINTEX-F2, SINTEX-F3, CESM1-CAM5-SE-LR, CESM1-CAM5-SE-HR, CMCC-CM2-HR4, CMCC-CM2-VHR4, ECMWF-IFS-LR, ECMWF-IFS-MR, ECMWF-IFS-HR, HadGEM3-GC31-LL, HadGEM3-GC31-MM, HadGEM3-GC31-HM, HadGEM3-GC31-HH, MPI-ESM1-2-HR, and MPI-ESM1-2-XR models, respectively. The LR in the bottom left of the panel stands for the low-resolution model, whereas the HR corresponds to the high-resolution model.





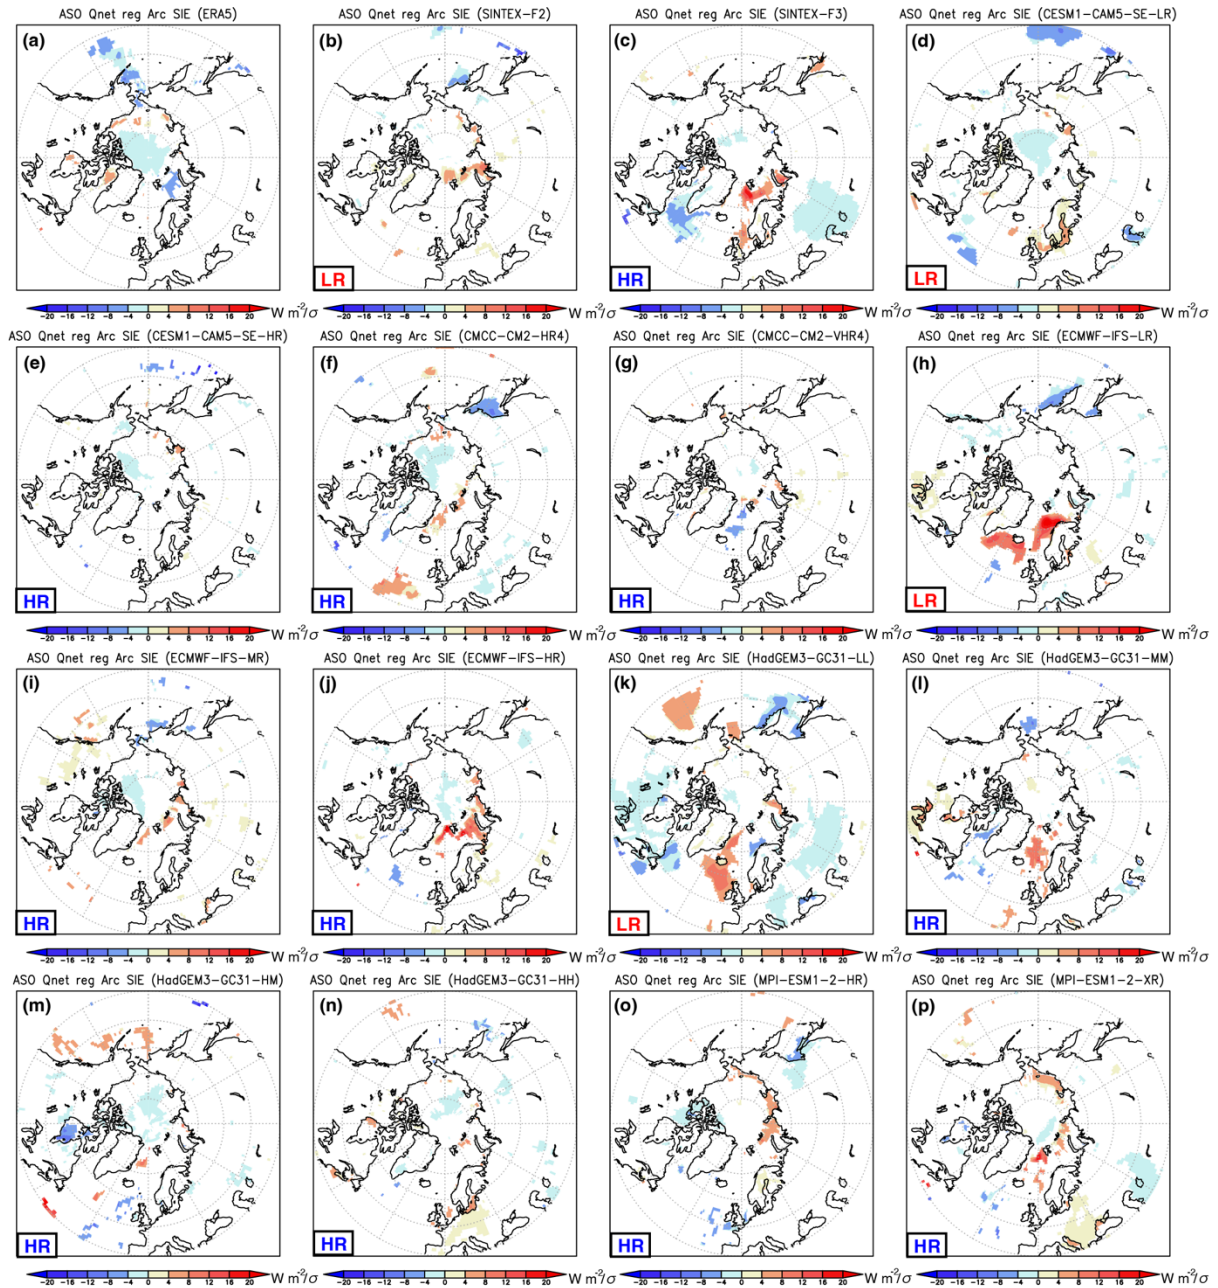

**Supplementary Figure 24 (a)** Spatial pattern of August-October mean net surface heat flux anomalies (in  $\text{W m}^{-2}/\sigma$ ) regressed onto the standardized Arctic sea ice extent (SIE) anomalies for the NSIDC\_Nimbus dataset. Color indicates a statistically significant value that exceeds 90 % confidence level using a Student's  $t$ -test. **(b-p)** Same as in (a), but for the SINTEX-F2, SINTEX-F3, CESM1-CAM5-SE-LR, CESM1-CAM5-SE-HR, CMCC-CM2-HR4, CMCC-CM2-VHR4, ECMWF-IFS-LR, ECMWF-IFS-MR, ECMWF-IFS-HR, HadGEM3-GC31-LL, HadGEM3-GC31-MM, HadGEM3-GC31-HM, HadGEM3-GC31-HH, MPI-ESM1-2-HR, and MPI-ESM1-2-XR models, respectively. The LR in the bottom left of the panel stands for the low-resolution model, whereas the HR corresponds to the high-resolution model.



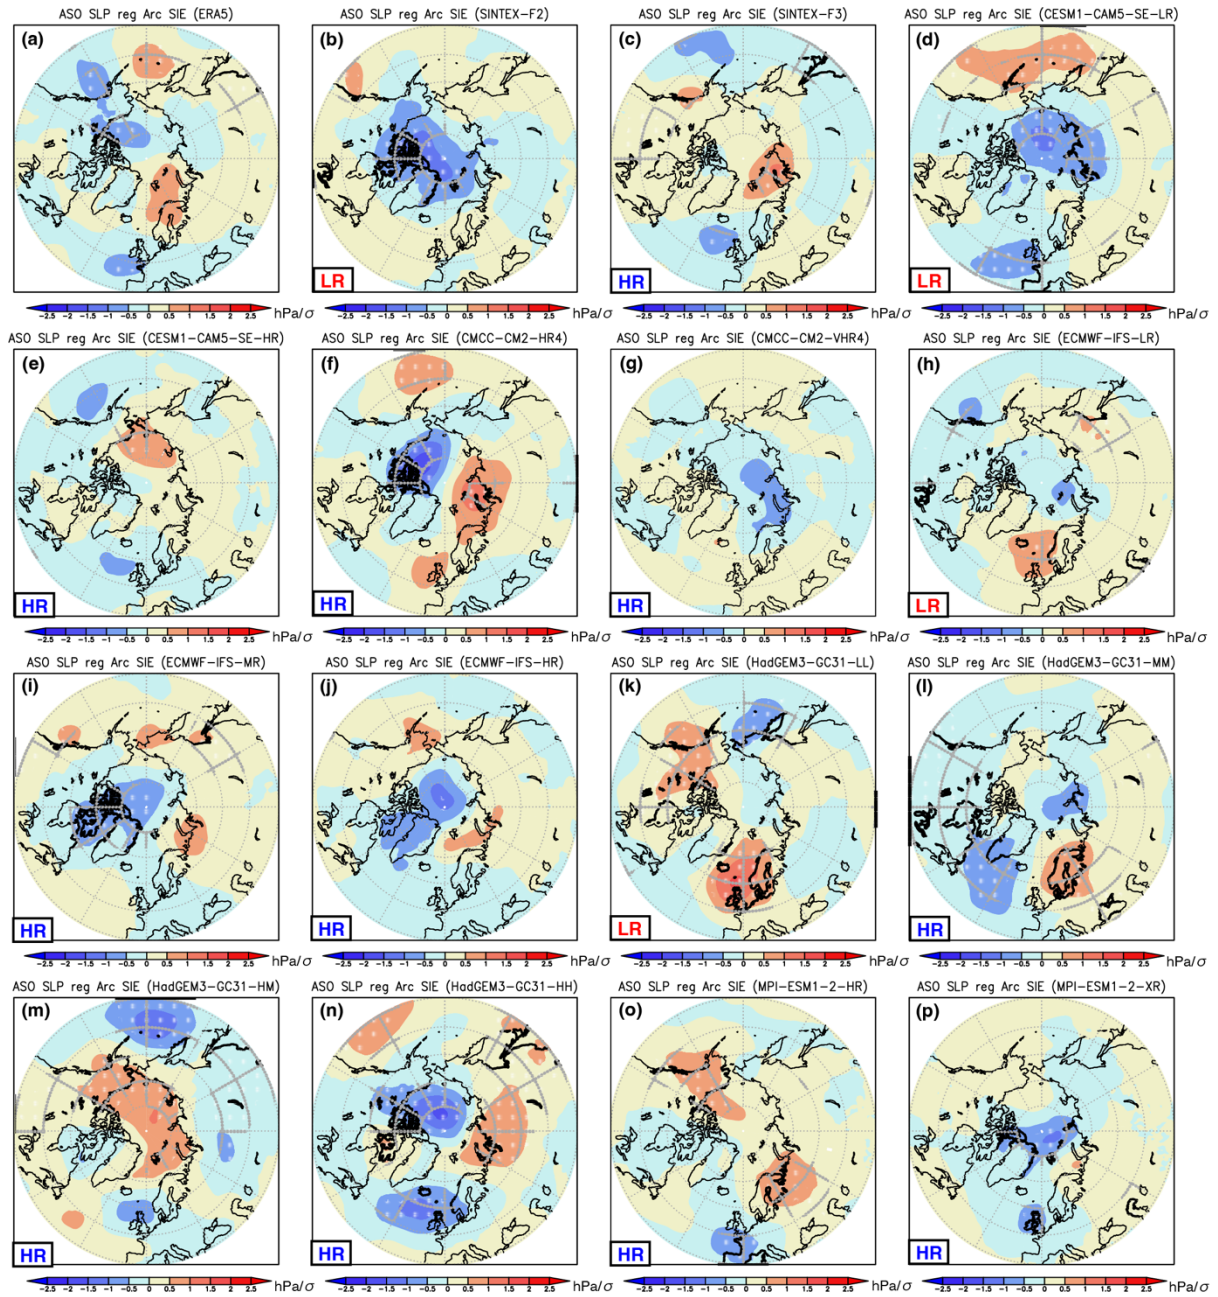

**Supplementary Figure 25** (a) Spatial pattern of August-October mean sea level pressure anomalies (SLP; in  $\text{hPa}/\sigma$ ) regressed onto the standardized Arctic sea ice extent (SIE) anomalies for the ERA5 reanalysis product. A white dot indicate a statistically significant value that exceeds 90 % confidence level using a Student's  $t$ -test. (b-p) Same as in (a), but for the SINTEX-F2, SINTEX-F3, CESM1-CAM5-SE-LR, CESM1-CAM5-SE-HR, CMCC-CM2-HR4, CMCC-CM2-VHR4, ECMWF-IFS-LR, ECMWF-IFS-MR, ECMWF-IFS-HR, HadGEM3-GC31-LL, HadGEM3-GC31-MM, HadGEM3-GC31-HM, HadGEM3-GC31-HH, MPI-ESM1-2-HR, and MPI-ESM1-2-XR models, respectively. The LR in the bottom left of the panel stands for the low-resolution model, whereas the HR corresponds to the high-resolution model.

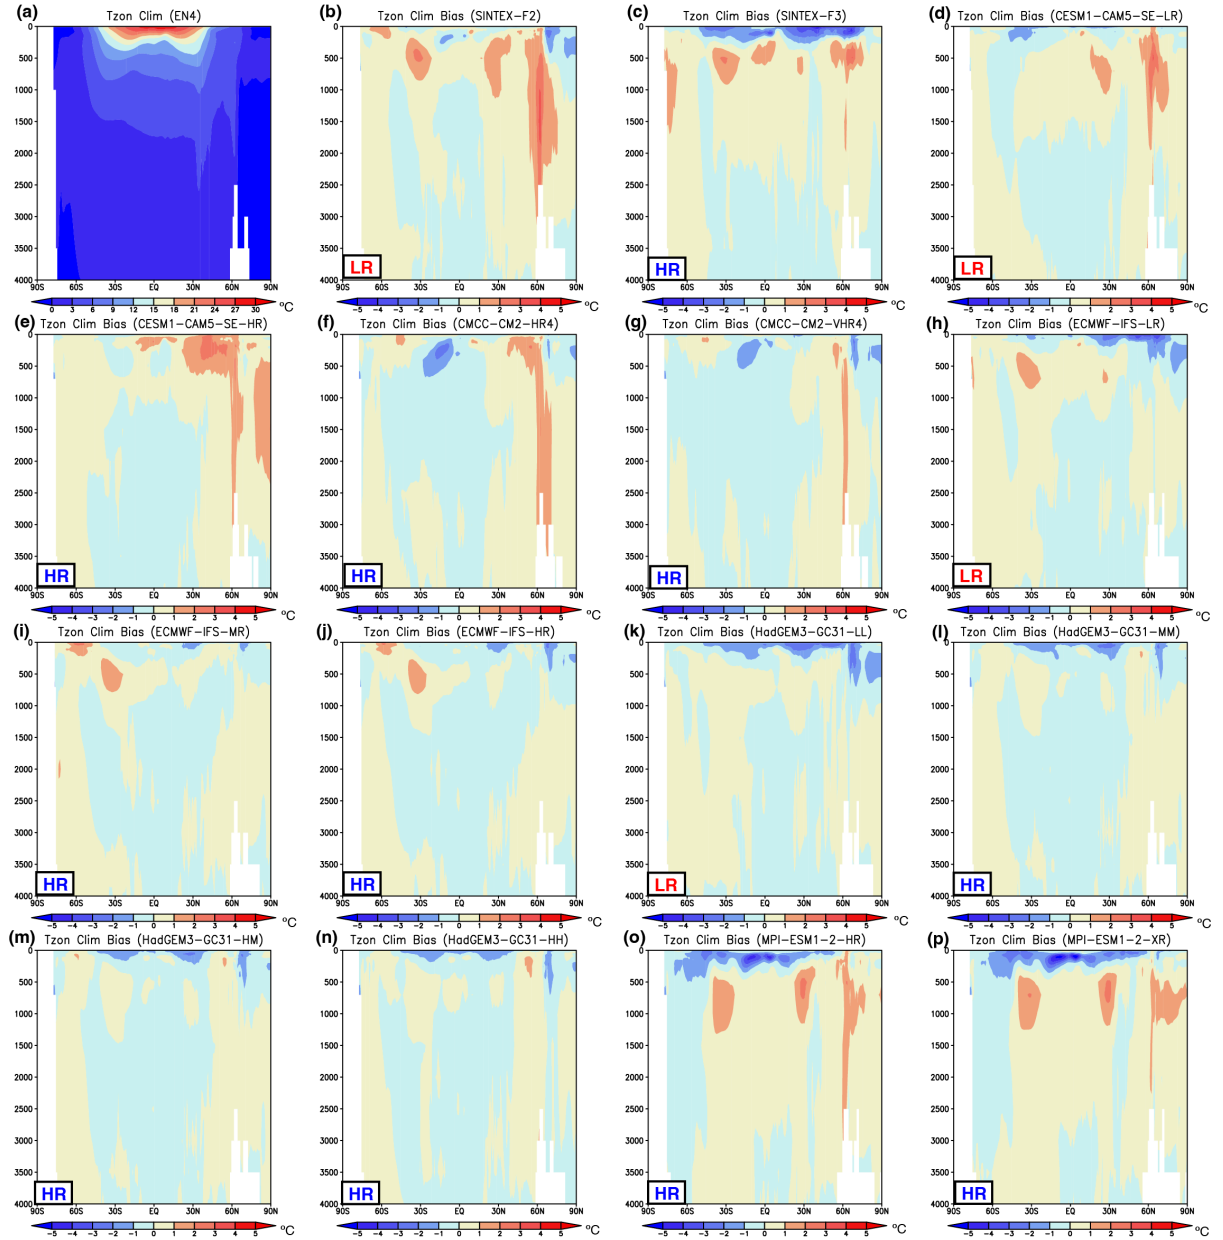

**Supplementary Figure 26** (a) Annual mean of zonally-averaged ocean potential temperature (Tzon; in °C) observed during 1982-2023 as a function of the depth from the EN4 dataset. (b) Difference in the annual mean of zonally-averaged ocean potential temperature (in °C) over the 42 years between the SINTEX-F2 model and EN4 dataset (i.e., model minus observation). (c-p) Same as in (b), but for the SINTEX-F3, CESM1-CAM5-SE-LR, CESM1-CAM5-SE-HR, CMCC-CM2-HR4, CMCC-CM2-VHR4, ECMWF-IFS-LR, ECMWF-IFS-MR, ECMWF-IFS-HR, HadGEM3-GC31-LL, HadGEM3-GC31-MM, HadGEM3-GC31-HM, HadGEM3-GC31-HH, MPI-ESM1-2-HR, and MPI-ESM1-2-XR models, respectively. The LR in the bottom left of the panel stands for the low-resolution model, whereas the HR corresponds to the high-resolution model.



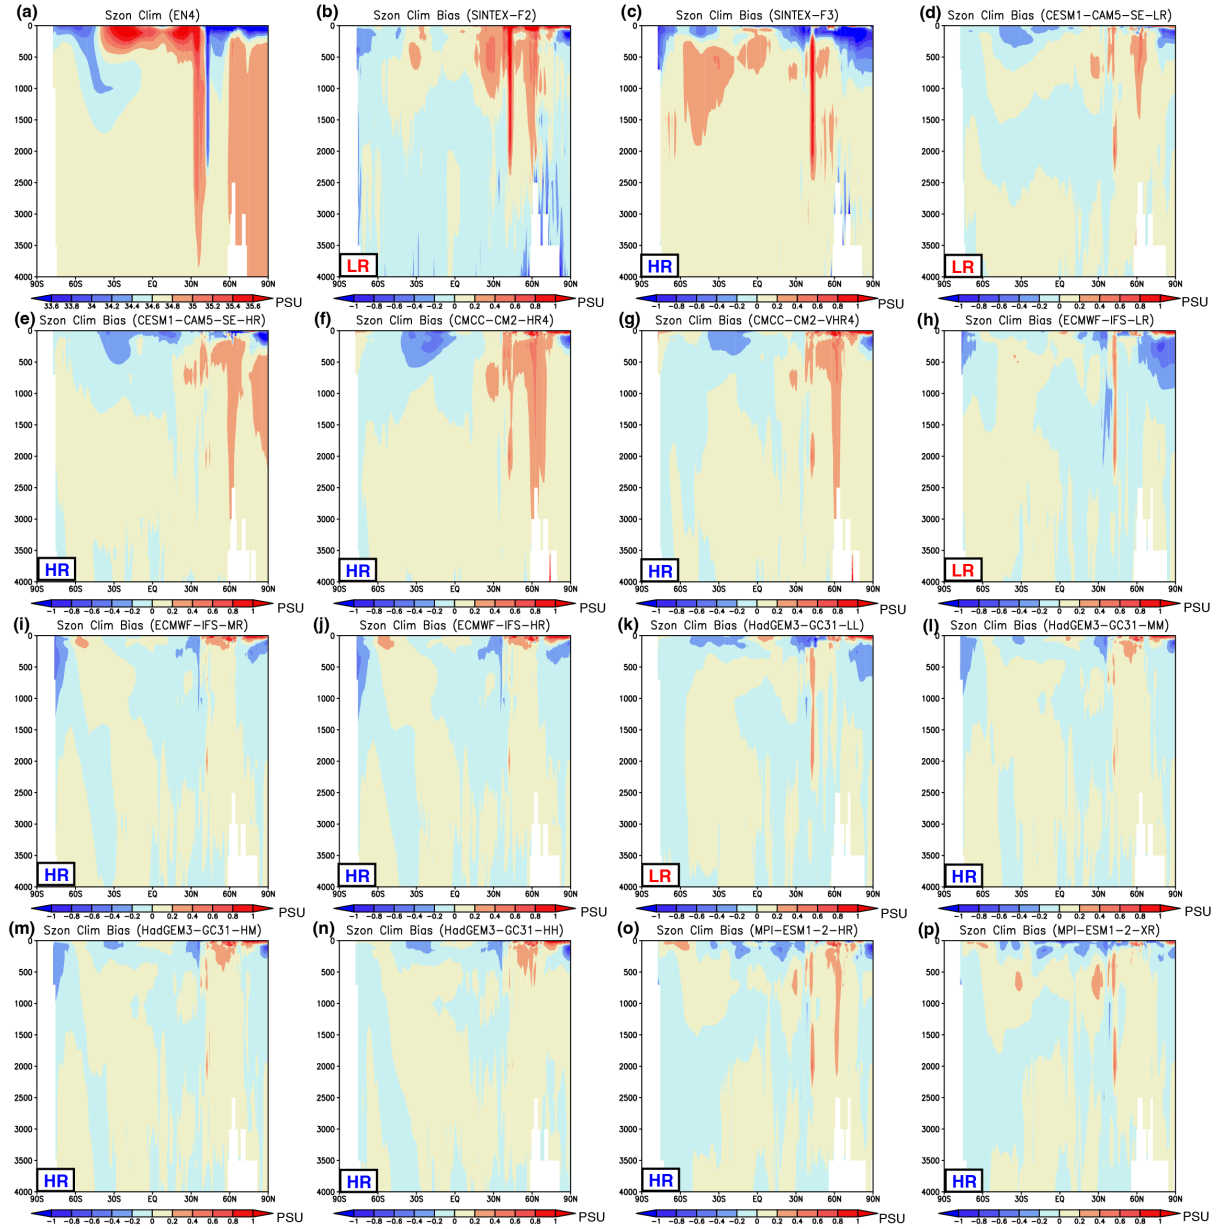

**Supplementary Figure 27** (a) Annual mean of zonally-averaged ocean salinity (Szon; in PSU) observed during 1982-2023 as a function of the depth from the EN4 dataset. (b) Difference in the annual mean of zonally-averaged ocean salinity (in PSU) over the 42 years between the SINTEX-F2 model and EN4 dataset (i.e., model minus observation). (c-p) Same as in (b), but for the SINTEX-F3, CESM1-CAM5-SE-LR, CESM1-CAM5-SE-HR, CMCC-CM2-HR4, CMCC-CM2-VHR4, ECMWF-IFS-LR, ECMWF-IFS-MR, ECMWF-IFS-HR, HadGEM3-GC31-LL, HadGEM3-GC31-MM, HadGEM3-GC31-HM, HadGEM3-GC31-HH, MPI-ESM1-2-HR, and MPI-ESM1-2-XR models, respectively. The LR in the bottom left of the panel stands for the low-resolution model, whereas the HR corresponds to the high-resolution model.

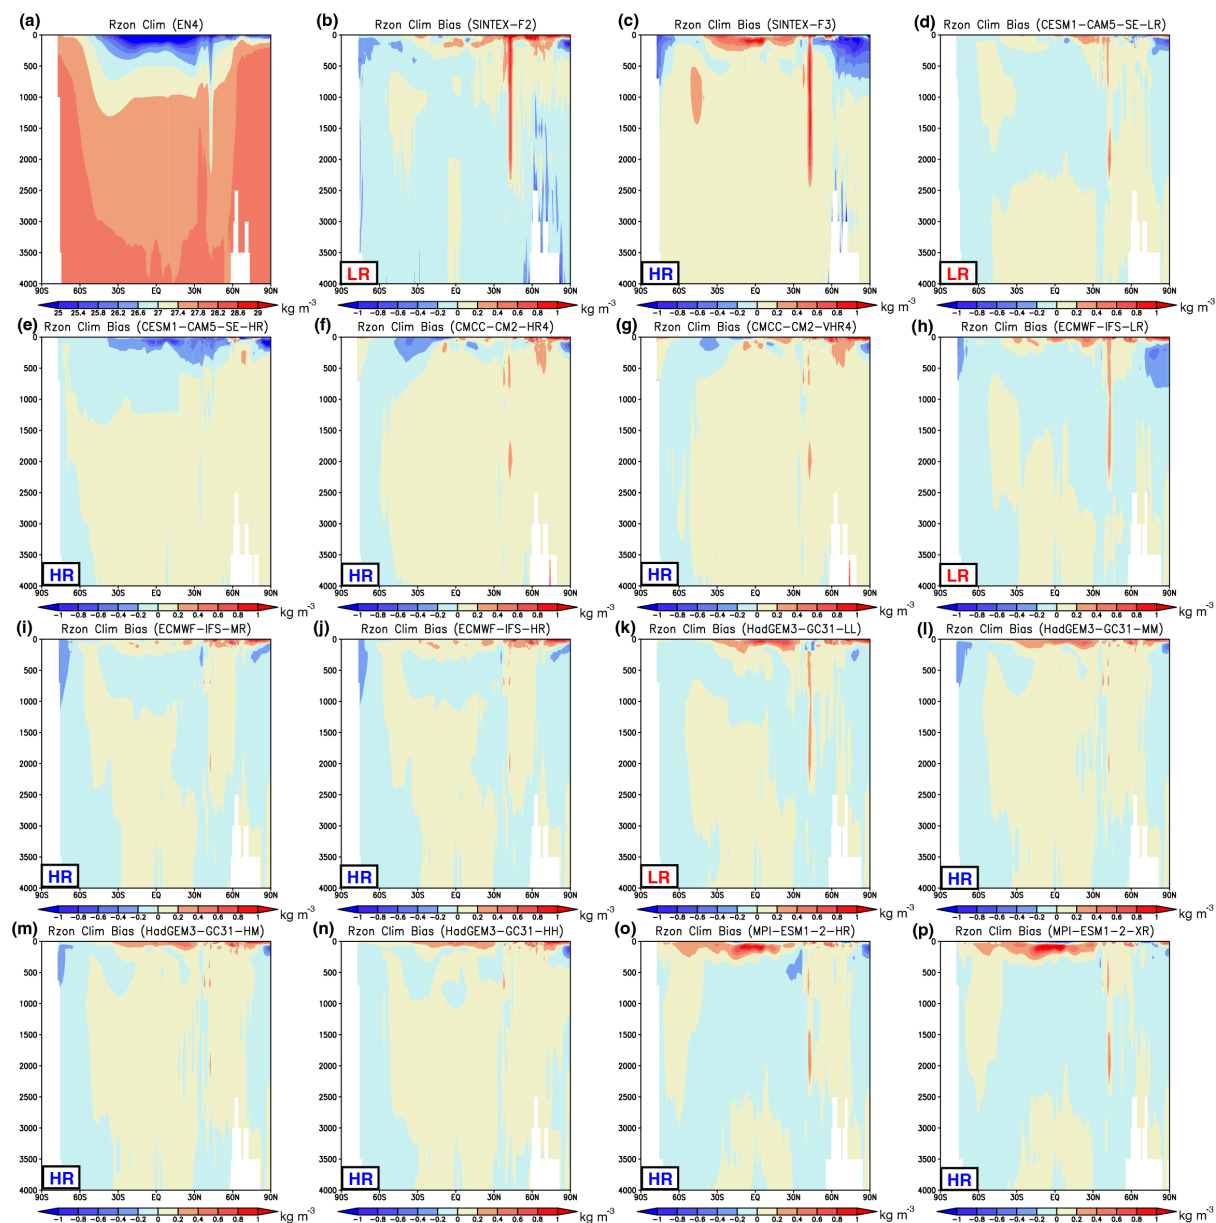

**Supplementary Figure 28** (a) Annual mean of zonally-averaged ocean potential density (Rzon; in  $\text{kg m}^{-3}$ ) observed during 1982-2023 as a function of the depth from the EN4 dataset. (b) Difference in the annual mean of zonally-averaged ocean potential density (in  $\text{kg m}^{-3}$ ) over the 42 years between the SINTEX-F2 model and EN4 dataset (i.e., model minus observation). (c-p) Same as in (b), but for the SINTEX-F3, CESM1-CAM5-SE-LR, CESM1-CAM5-SE-HR, CMCC-CM2-HR4, CMCC-CM2-VHR4, ECMWF-IFS-LR, ECMWF-IFS-MR, ECMWF-IFS-HR, HadGEM3-GC31-LL, HadGEM3-GC31-MM, HadGEM3-GC31-HM, HadGEM3-GC31-HH, MPI-ESM1-2-HR, and MPI-ESM1-2-XR models, respectively. The LR in the bottom left of the panel stands for the low-resolution model, whereas the HR corresponds to the high-resolution model.

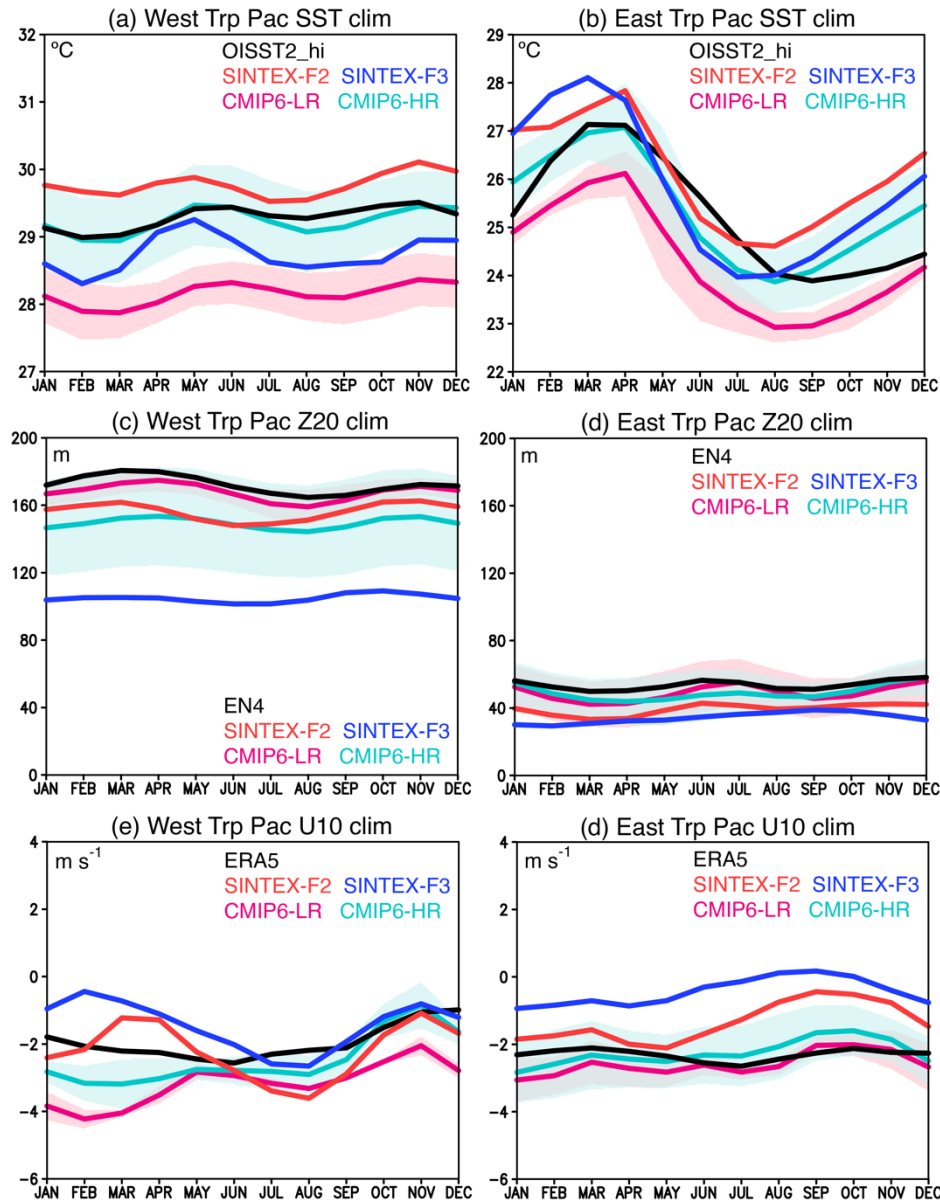

**Supplementary Figure 29** (a) Monthly climatology of the western tropical Pacific sea surface temperature (SST; in °C) for the OISST2\_hi (black) dataset, SINTEX-F2 (red), SINTEX-F3 (blue), CMIP6-LR (magenta), and CMIP6-HR (light blue) models. Color shades indicate plus and minus one standard deviation of the model spreads. (b) Same as in (a), but for the eastern tropical Pacific SST (in °C). (c-d) Same as in (a-b), but for the thermocline depth (Z20; in m). The observation from EN4 dataset was used. (e-f) Same as in (a-b), but for the zonal wind speed at 10 m (U10; in m s<sup>-1</sup>).
